# Supplementary material for: Bioactive-Guided Phytochemical Investigations, In Vitro and In Silico Alpha-Glucosidase Inhibition of Two Vietnamese Medicinal Plants Dicranopteris linearis and Psychotria adenophylla
Source: MDPI journal article supplement (doi:10.3390/ph16091253), 2023-09-05
Supplement: s1 [file s1]

## Supporting information

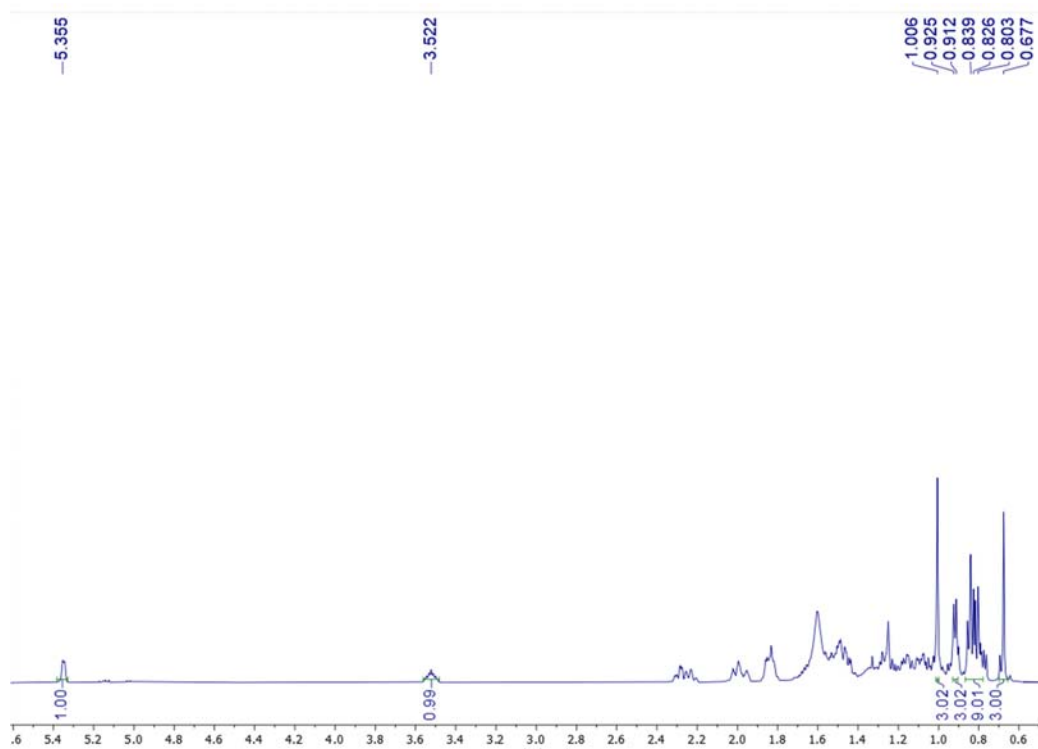

Figure S1.1.  $^1\text{H}$  NMR spectrum of DL1 ( $\text{CDCl}_3$ )

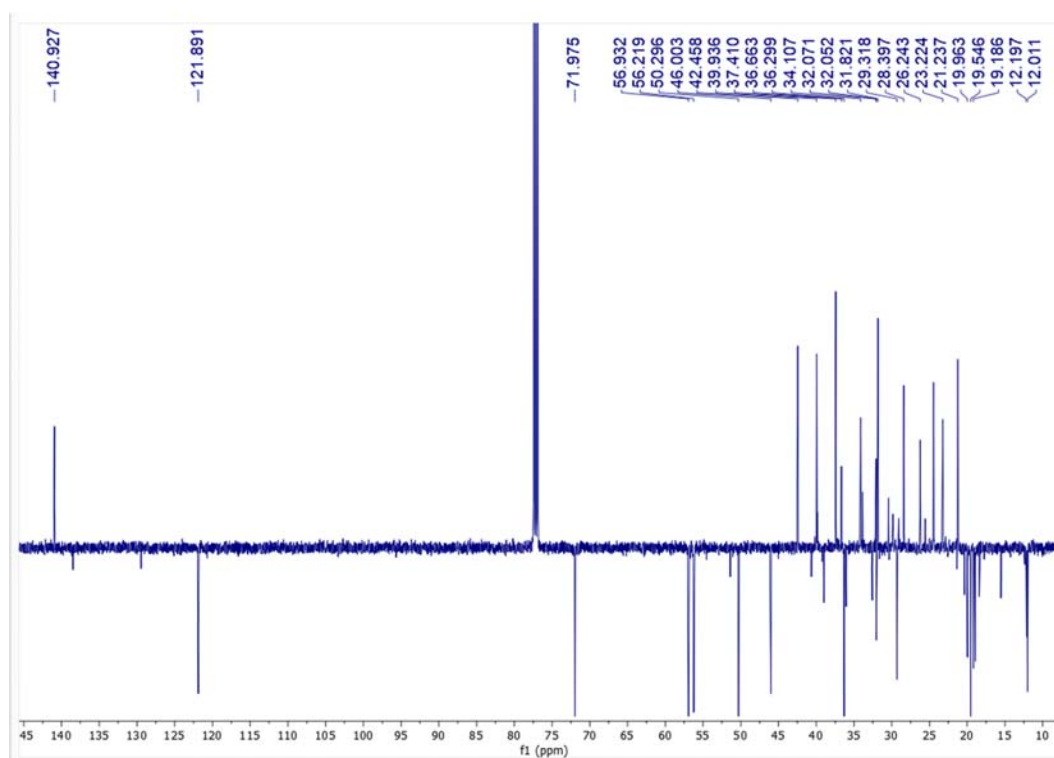

Figure S1.2.  $^{13}\text{C}$  NMR spectrum of DL1 ( $\text{CDCl}_3$ )

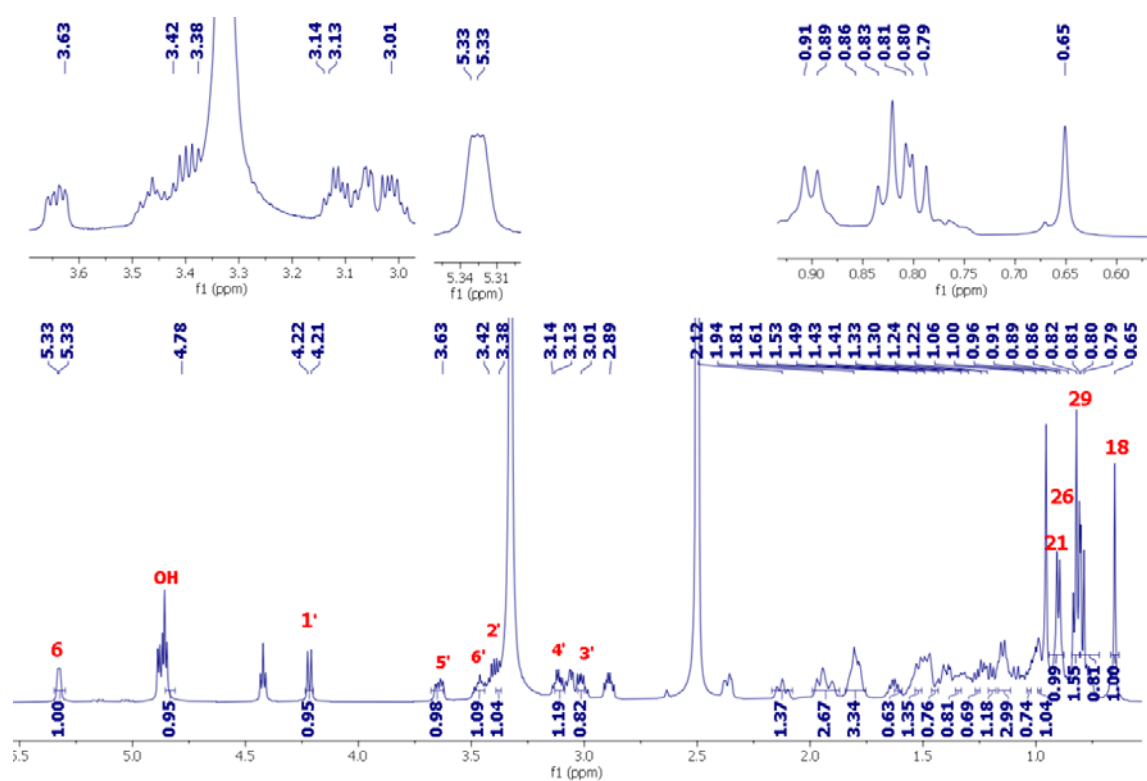

Figure S2.1. <sup>1</sup>H NMR spectrum of DL2 (DMSO-*d*<sub>6</sub>)

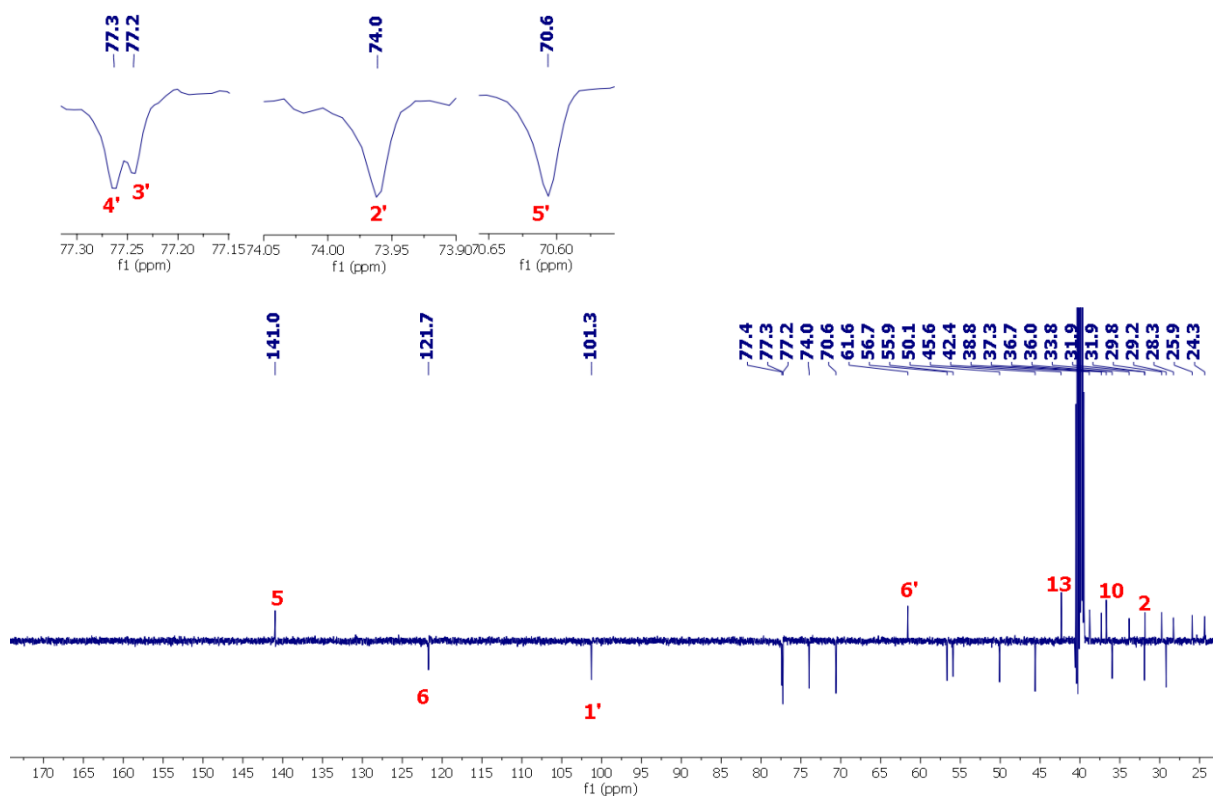

Figure S2.2. <sup>13</sup>C NMR spectrum of DL2 (DMSO-*d*<sub>6</sub>)

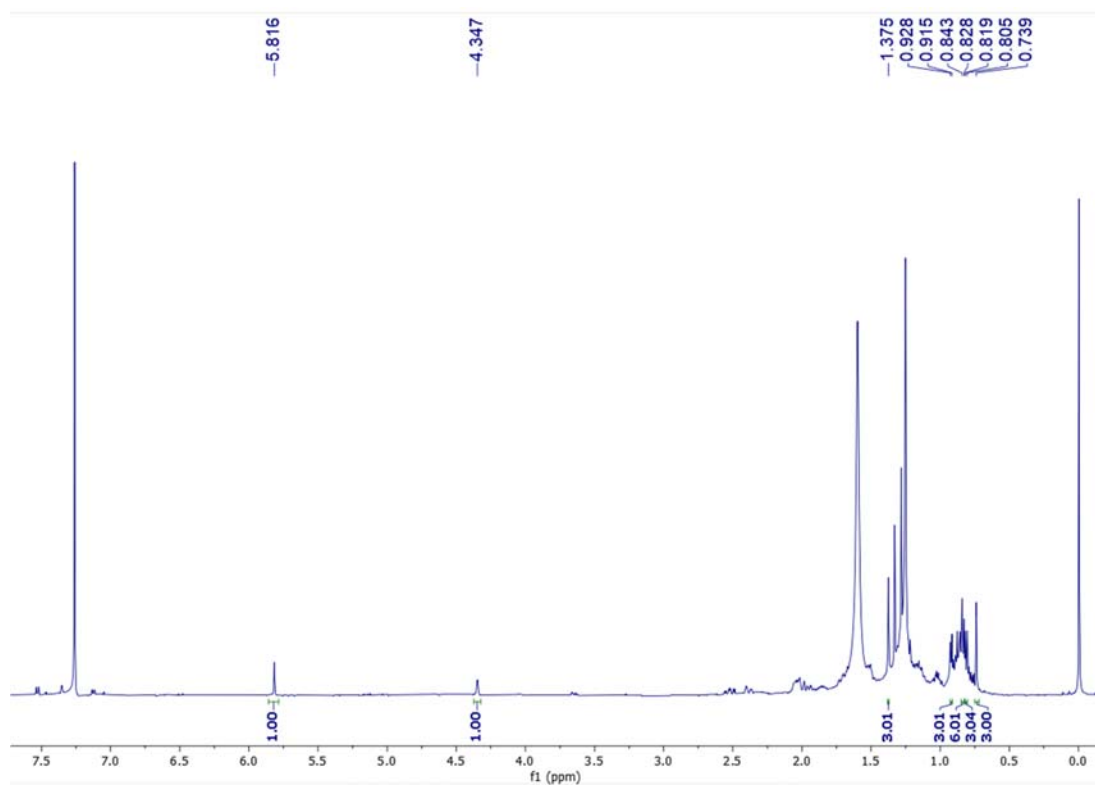

Figure S3.1. <sup>1</sup>H NMR spectrum of DL3 (Chloroform-*d*)

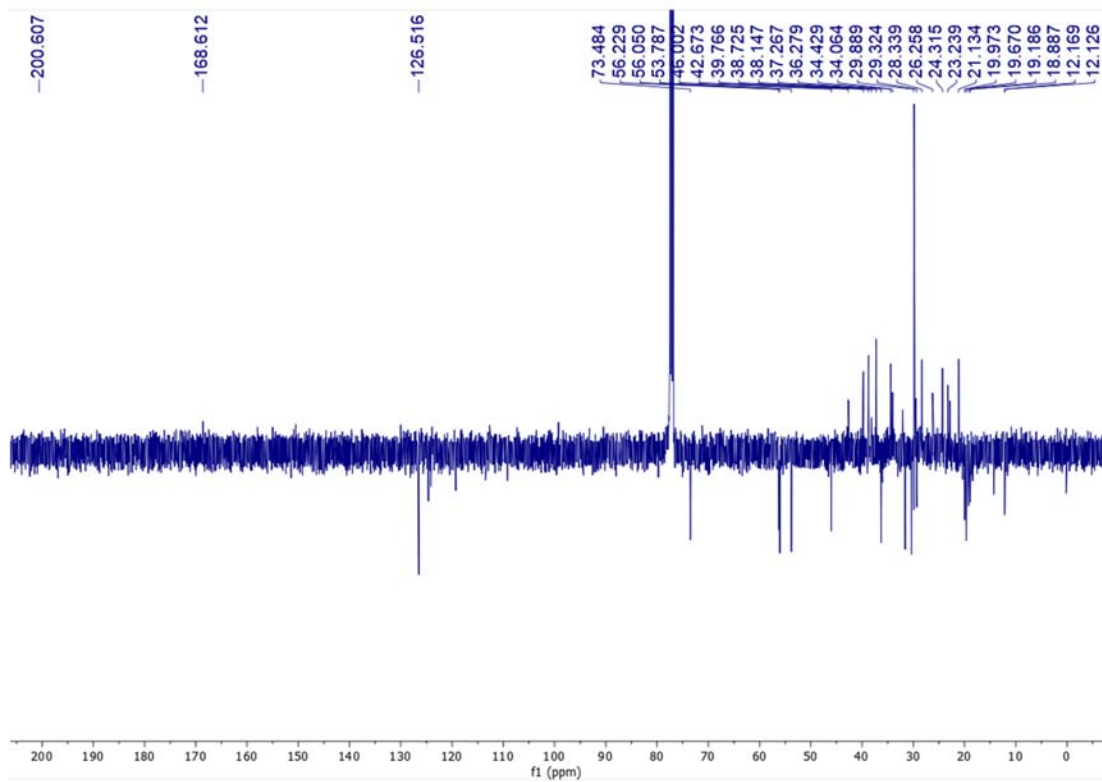

Figure S3.2. <sup>13</sup>C NMR spectrum of DL3 (Chloroform-*d*)

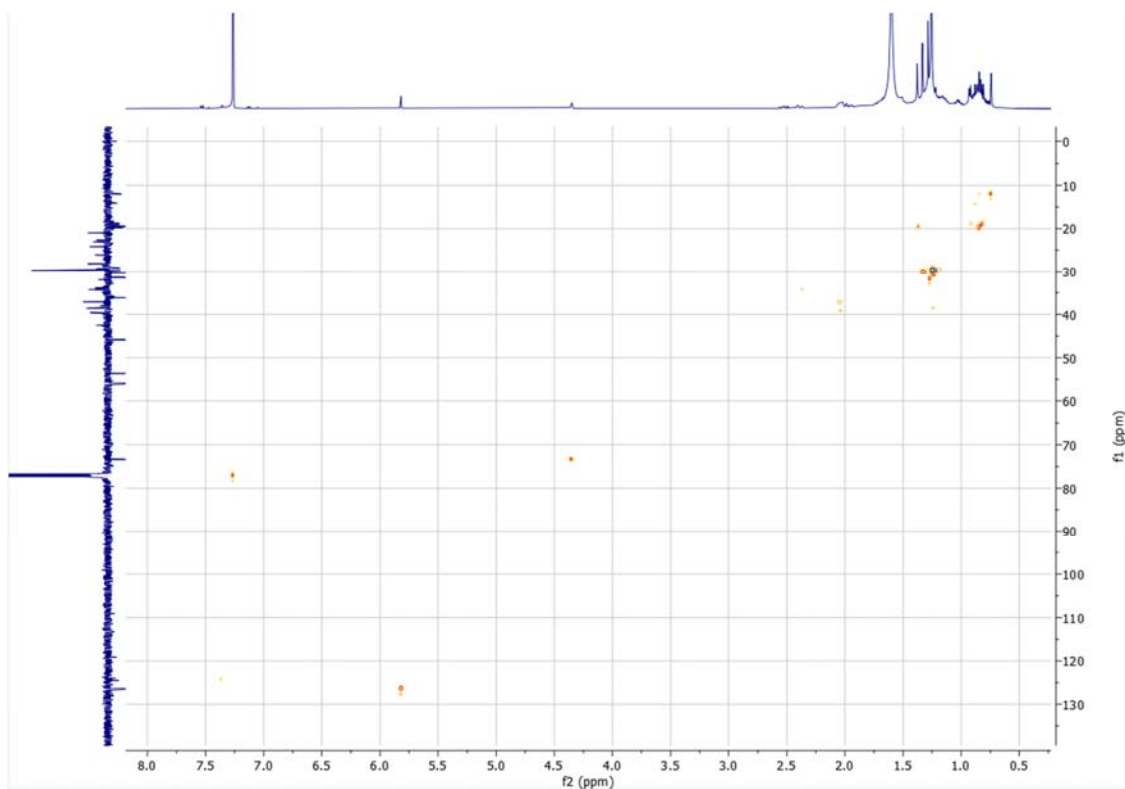

**Figure S3.3.** HSQC spectrum of **DL3** (Chloroform-*d*)

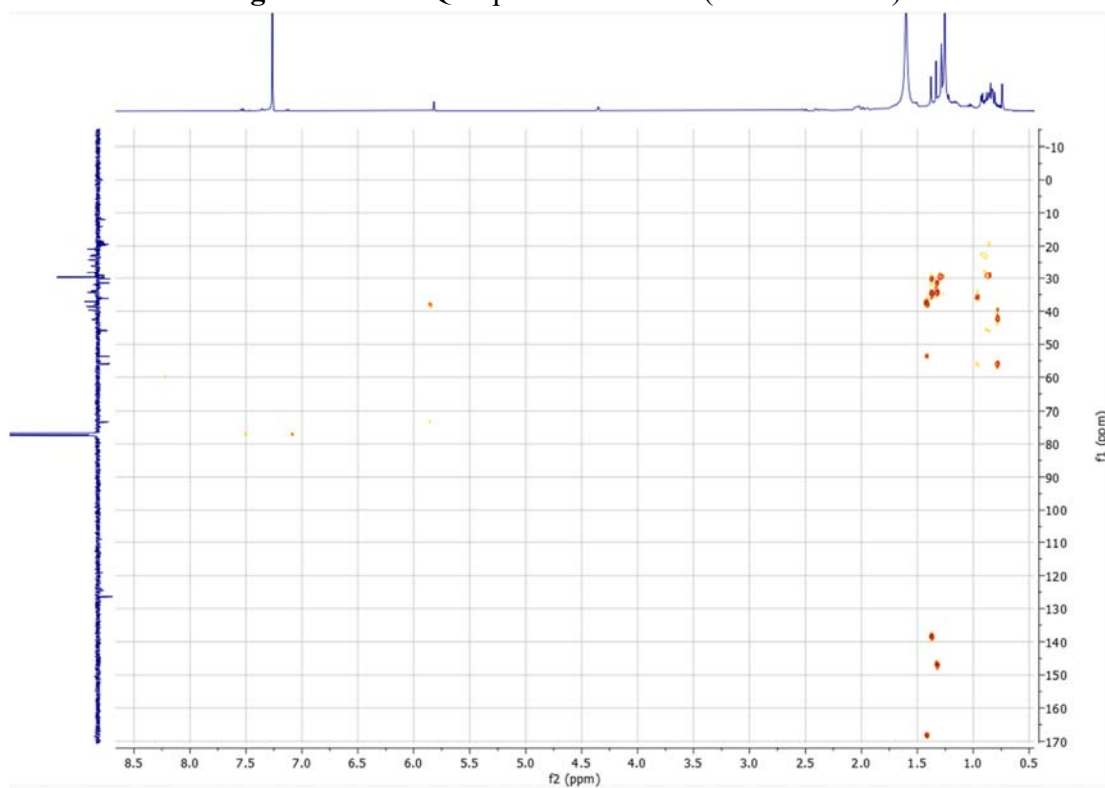

**Figure S3.4.** HMBC spectrum of **DL3** (Chloroform-*d*)

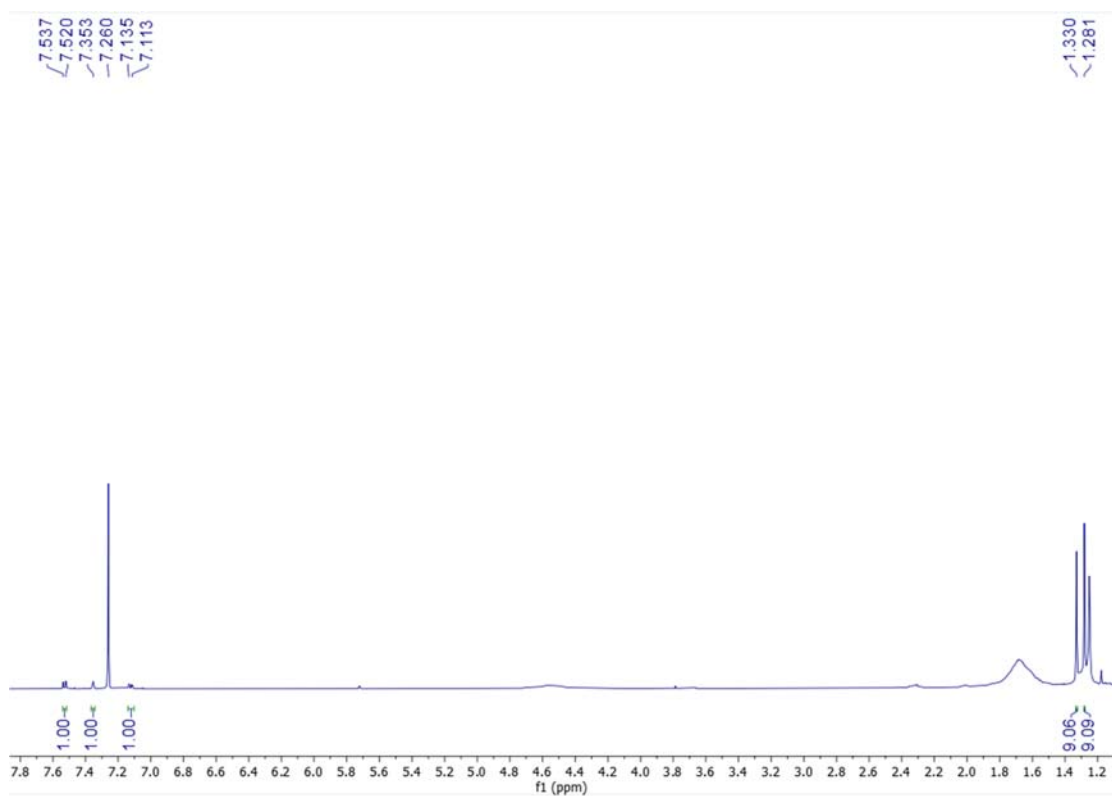

**Figure S4.1.** <sup>1</sup>H NMR spectrum of DL4 (Chloroform-*d*)

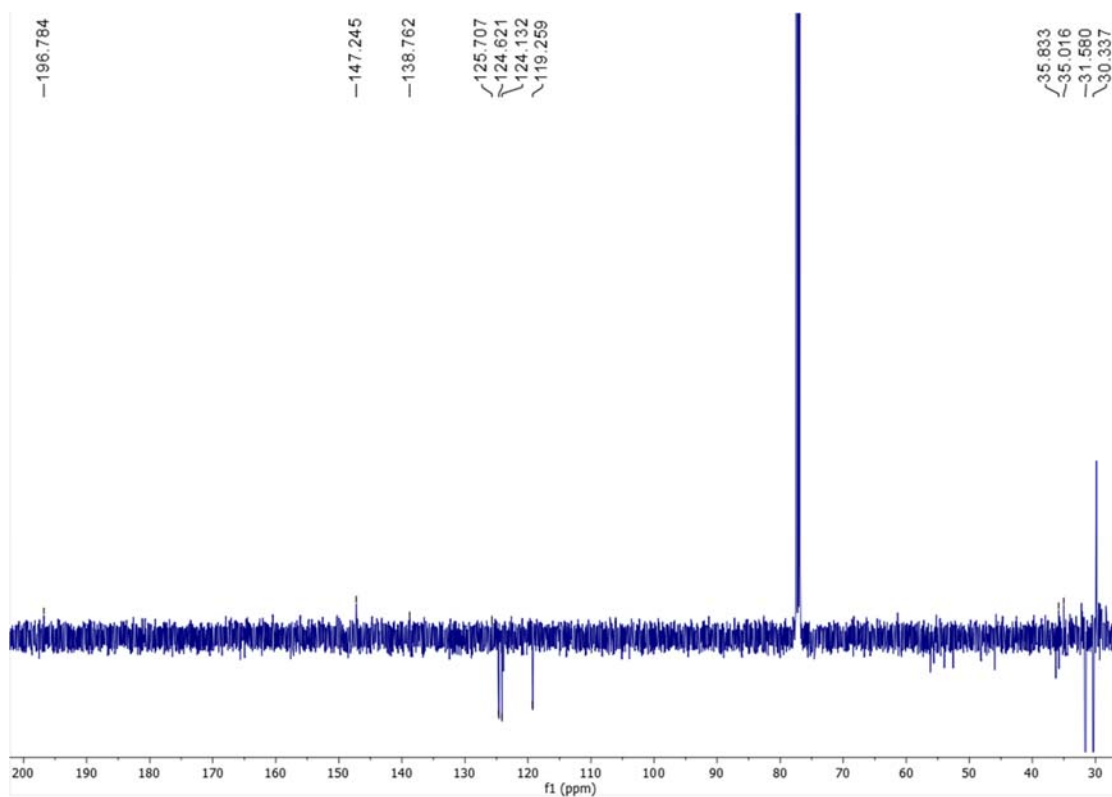

**Figure S4.2.** <sup>13</sup>C NMR spectrum of DL4 (Chloroform-*d*)

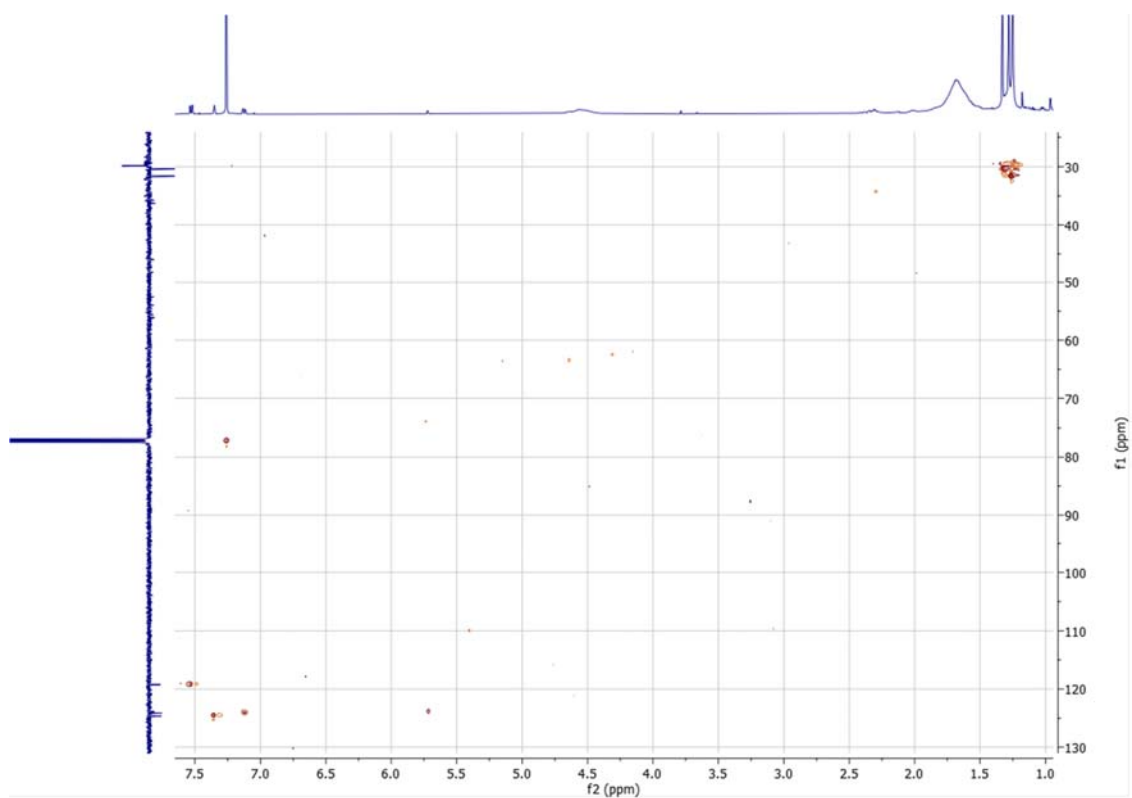

**Figure S4.3.** HSQC spectrum of **DL4** (Chloroform-*d*)

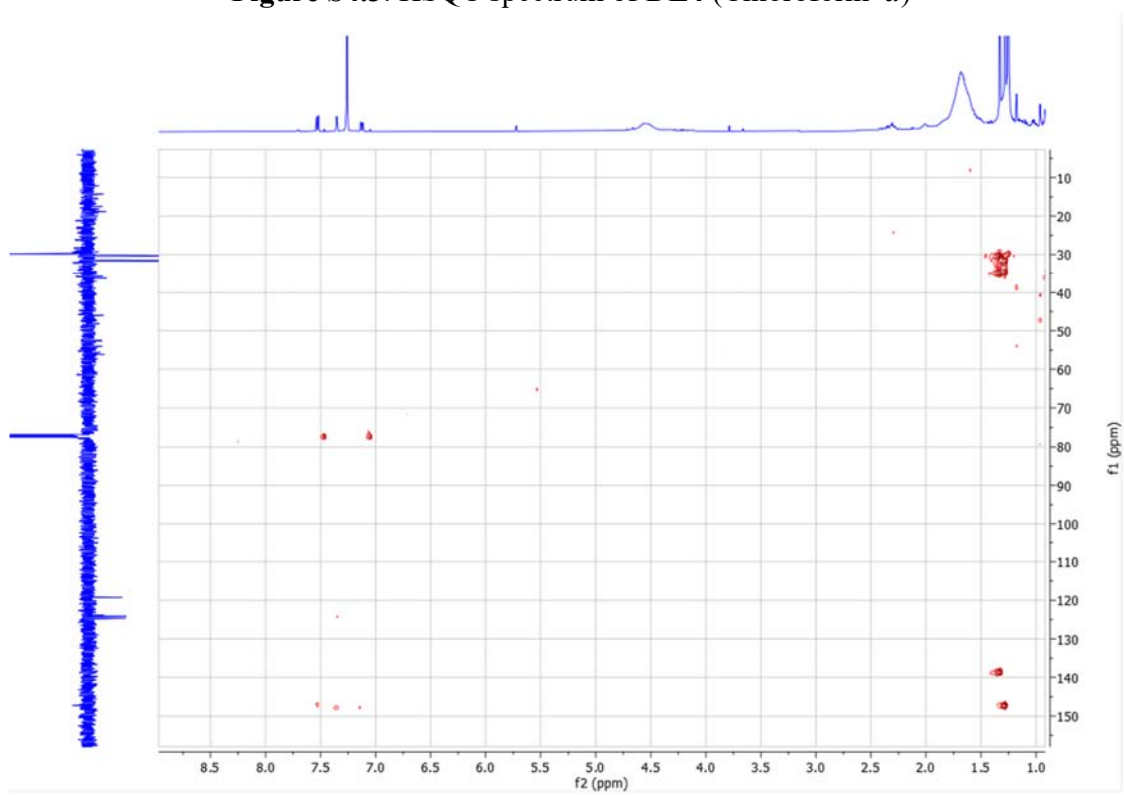

**Figure S4.4.** HMBC spectrum of **DL4** (Chloroform-*d*)

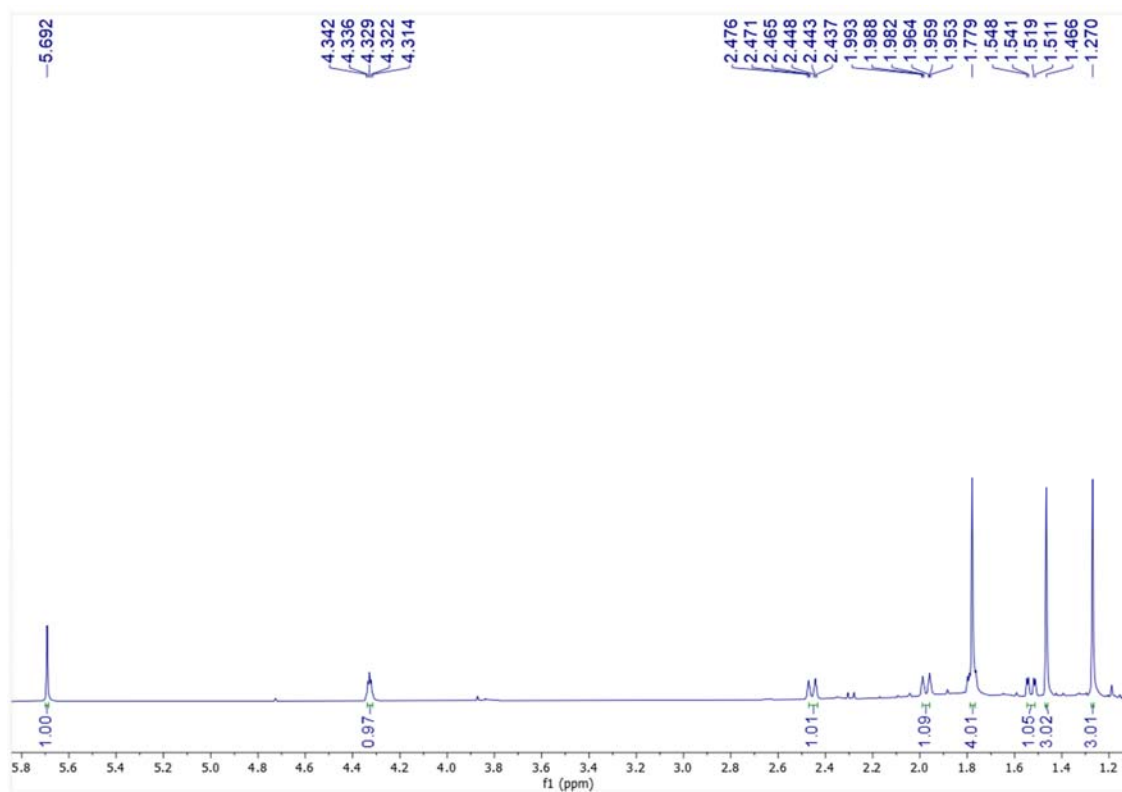

Figure S5.1. <sup>1</sup>H NMR spectrum of DL5 (Chloroform-*d*)

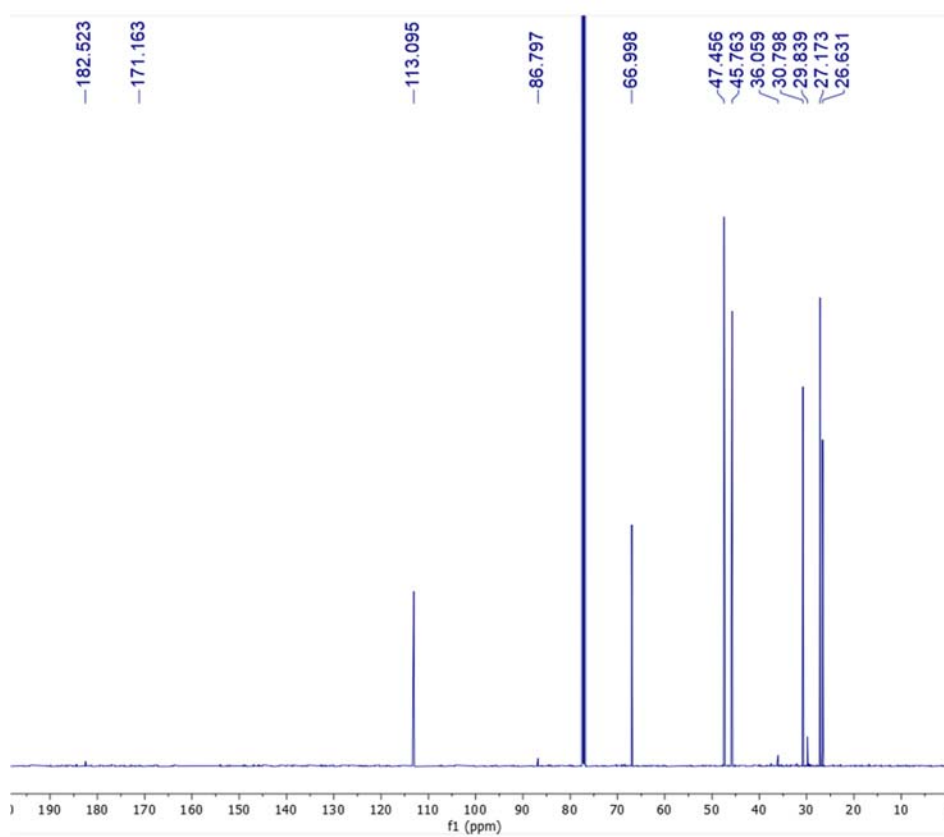

Figure S5.2. <sup>13</sup>C NMR spectrum of DL5 (Chloroform-*d*)

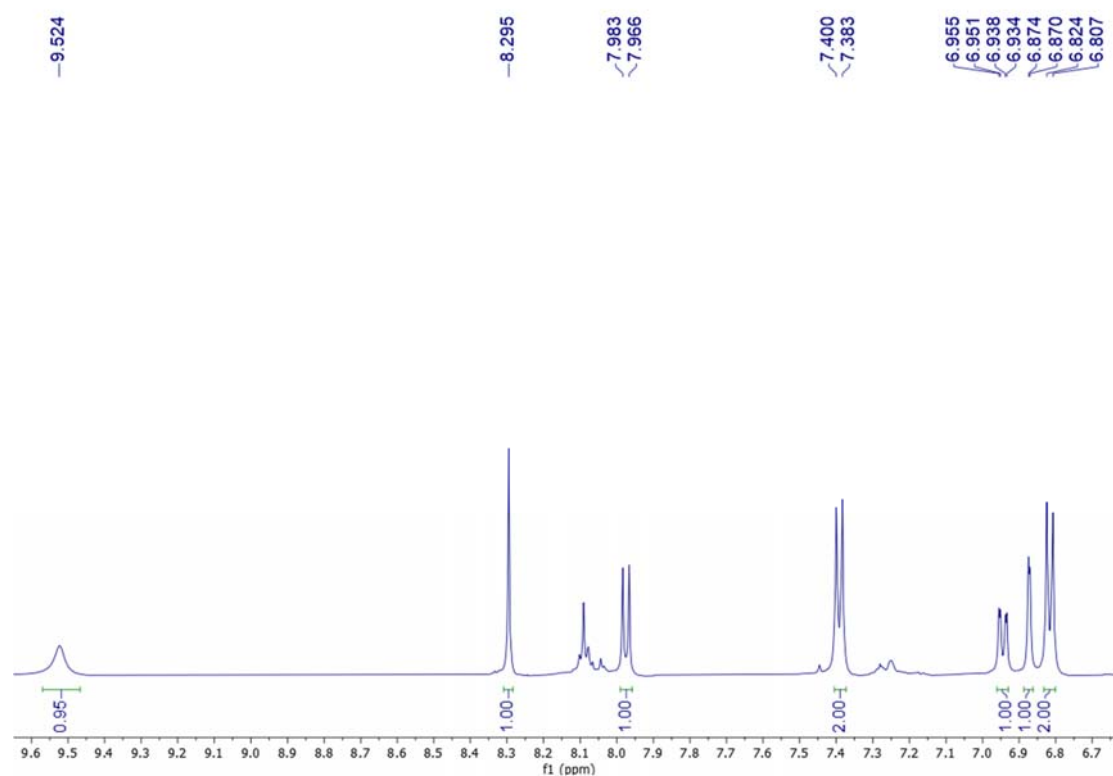

**Figure S6.1.** <sup>1</sup>H NMR spectrum of DL6 (DMSO-*d*<sub>6</sub>)

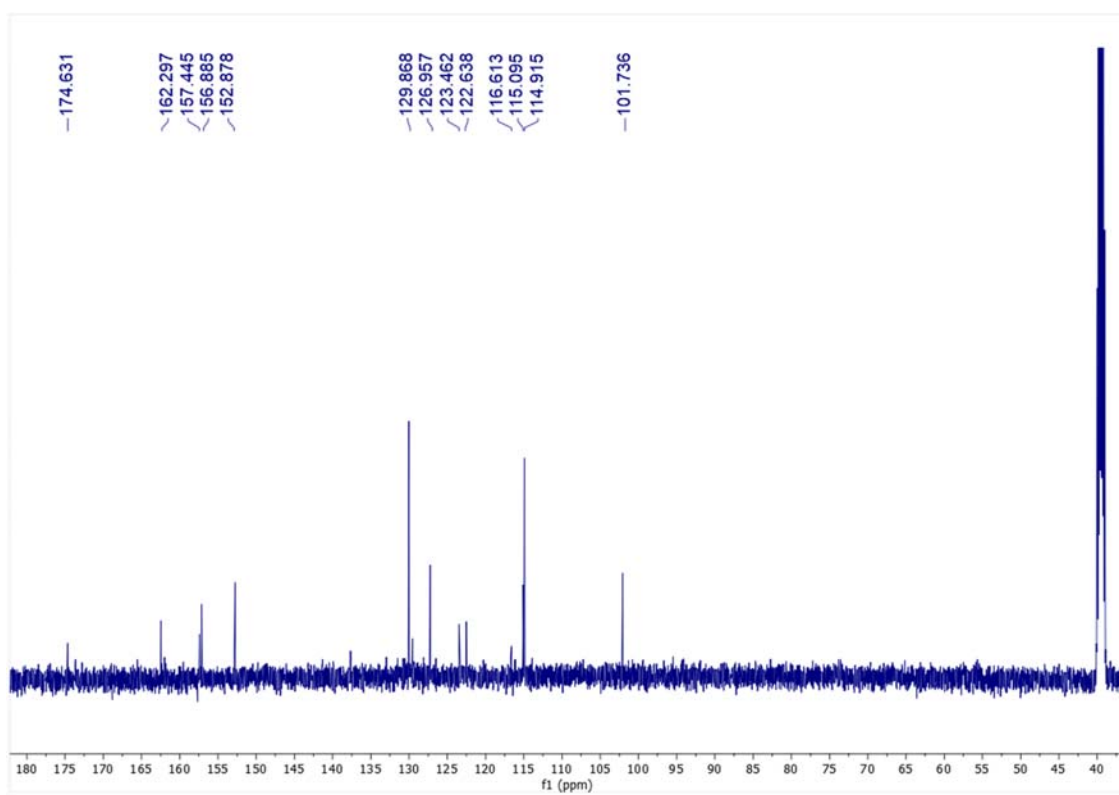

**Figure S6.2.** <sup>13</sup>C NMR spectrum of DL6 (DMSO-*d*<sub>6</sub>)



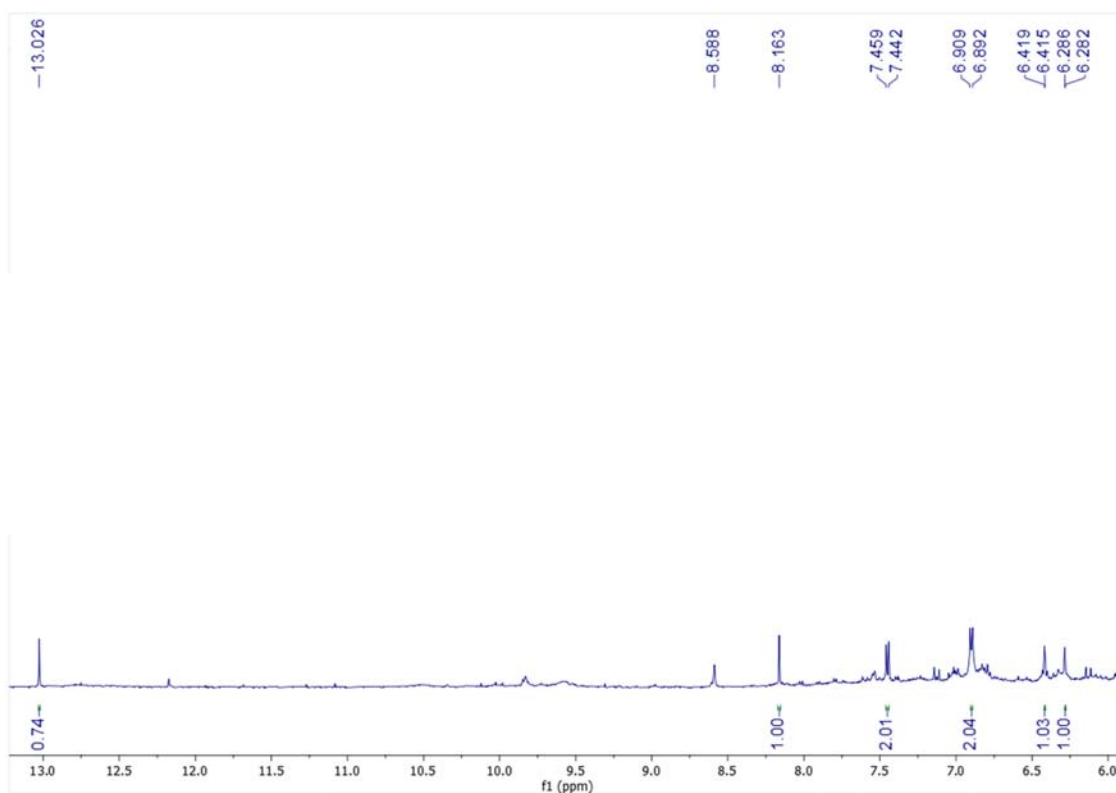

**Figure S7.1.** <sup>1</sup>H NMR and HMBC spectrum of **DL7** (Acetone-*d*<sub>6</sub>)

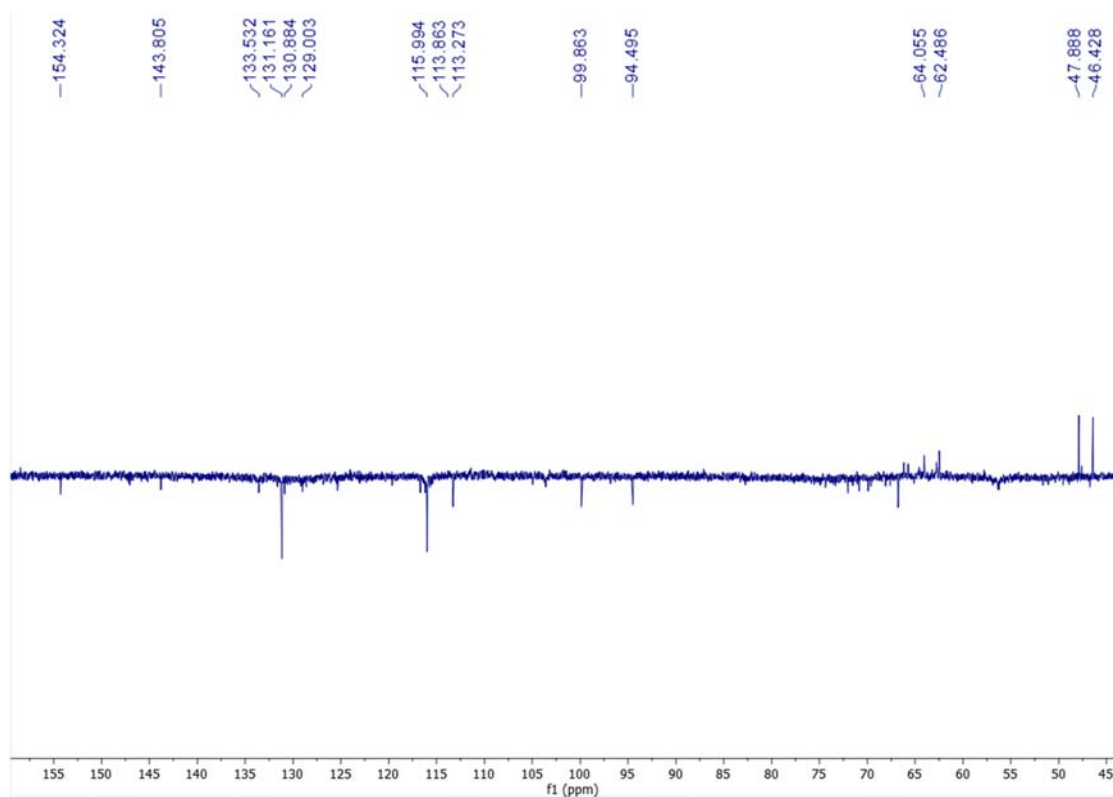

**Figure S7.2.** <sup>13</sup>C NMR and HMBC spectrum of **DL7** (Acetone-*d*<sub>6</sub>)

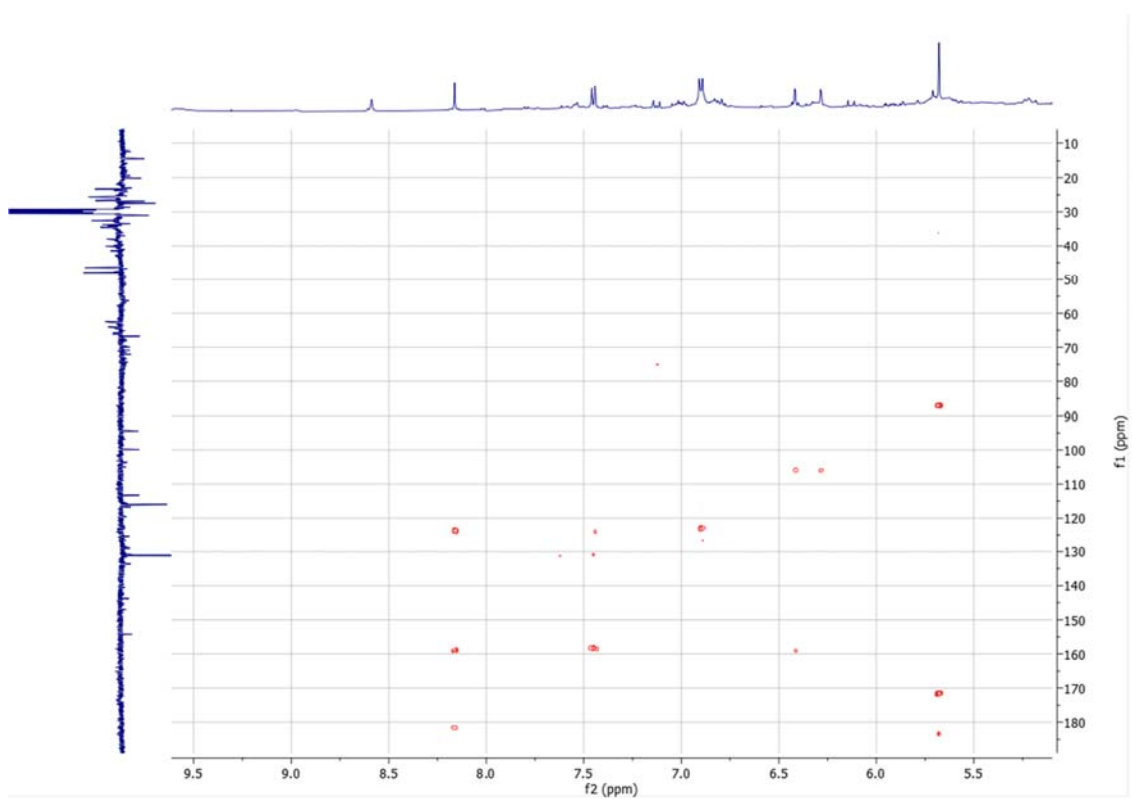

**Figure S7.3.** HMBC spectrum of **DL7** (Acetone- $d_6$ )

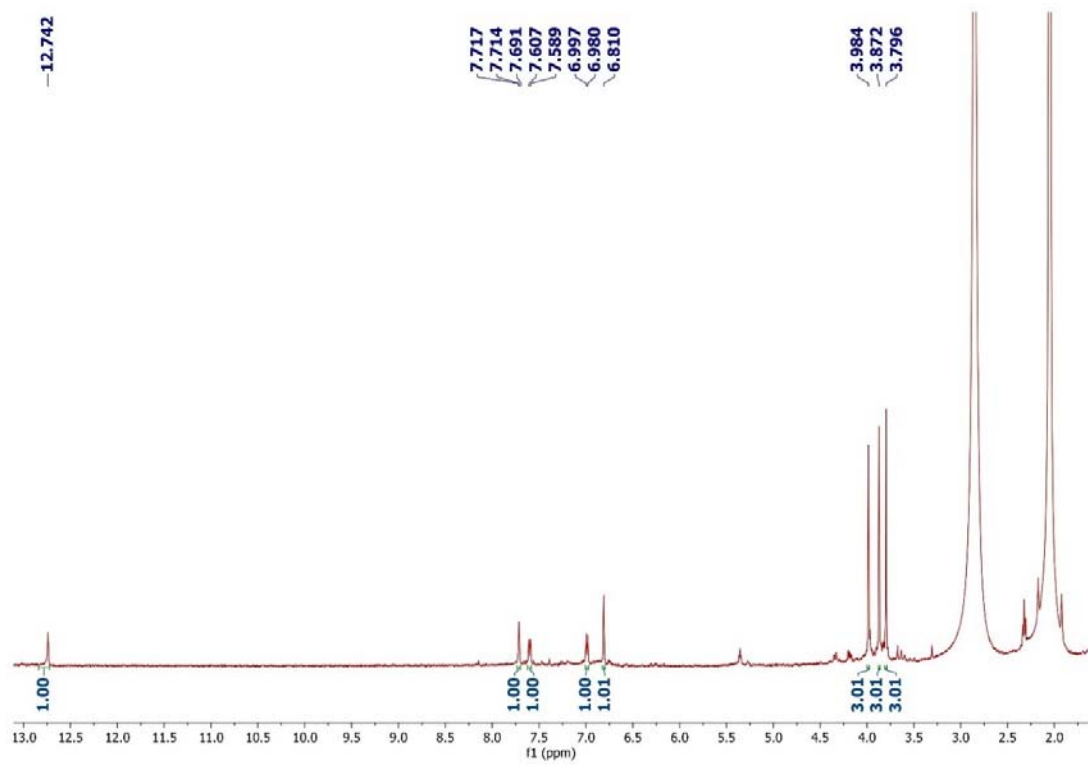

**Figure S8.1.**  $^1\text{H}$  NMR spectrum of **DL8** (Acetone- $d_6$ )

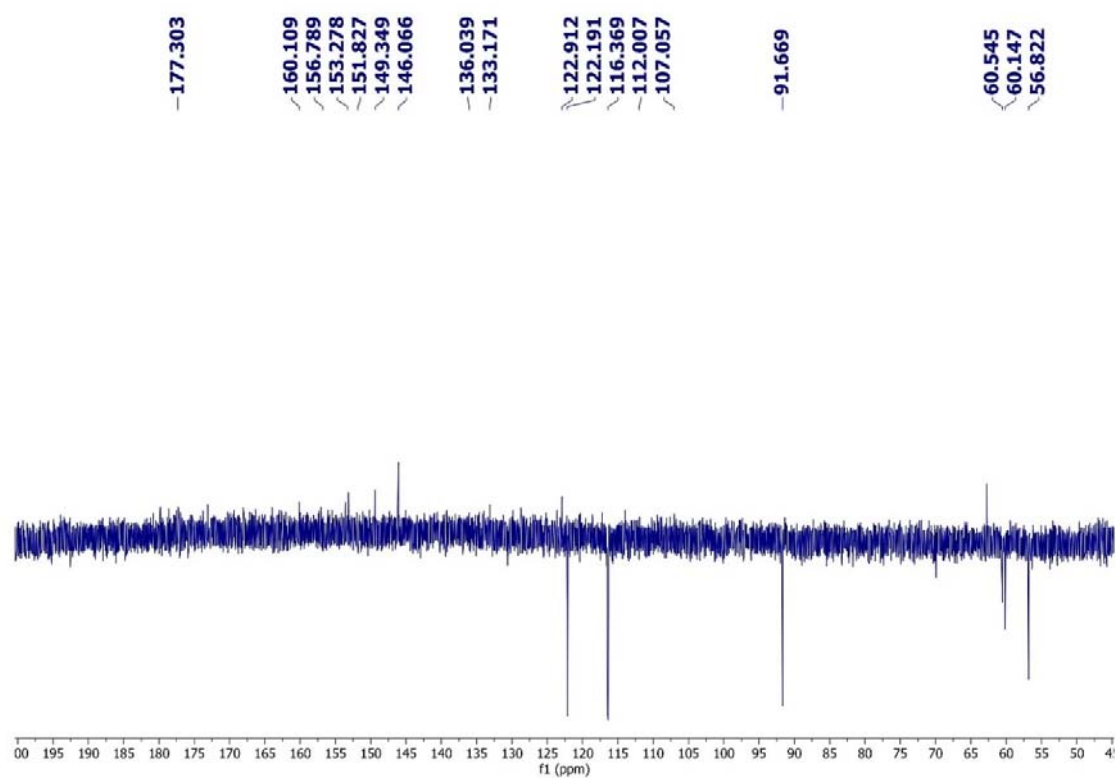

**Figure S8.2.**  $^{13}\text{C}$  NMR spectrum of **DL8** (Acetone- $d_6$ )

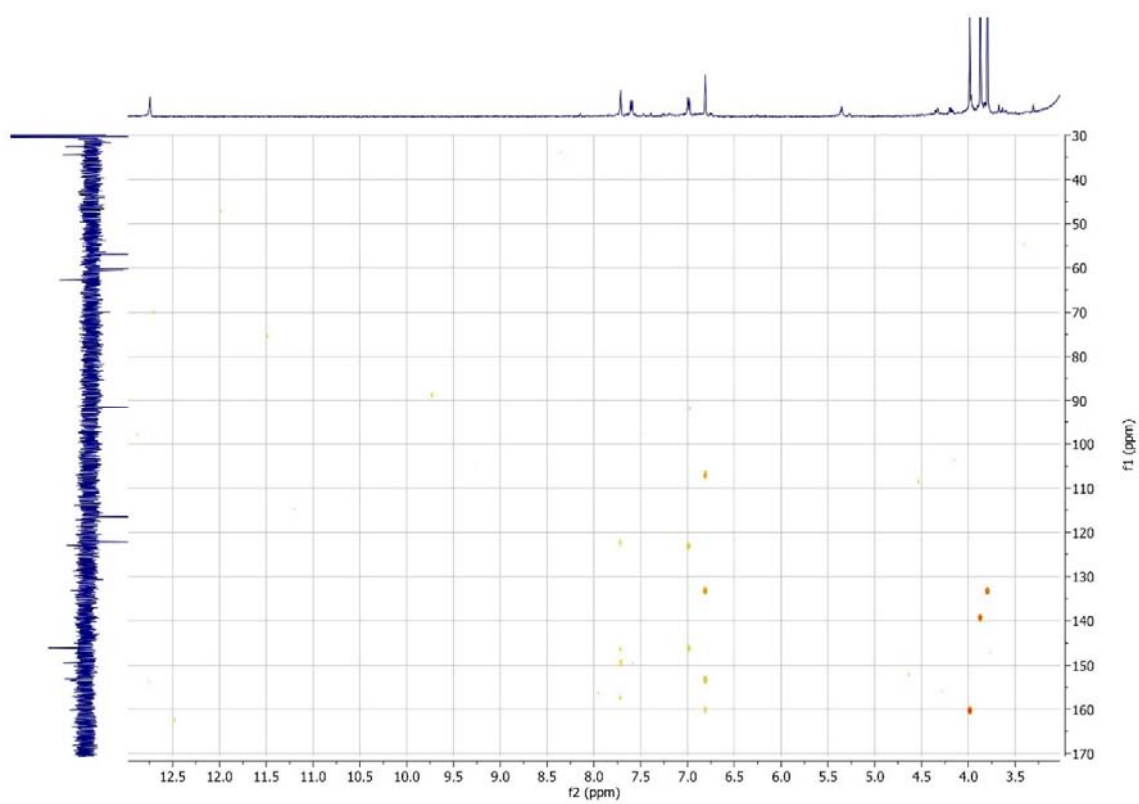

**Figure S8.3.** HMBC spectrum of **DL8** (Acetone- $d_6$ )

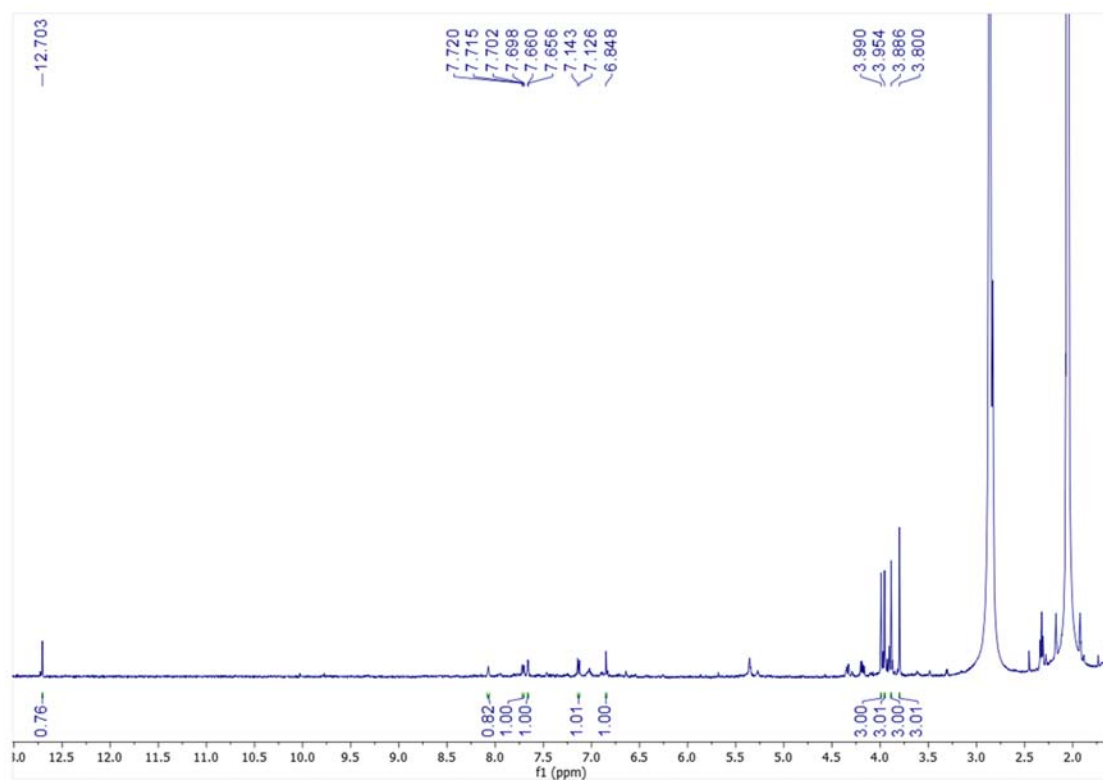

**Figure S9.1.** <sup>1</sup>H NMR spectrum of DL9 (Acetone-*d*<sub>6</sub>)

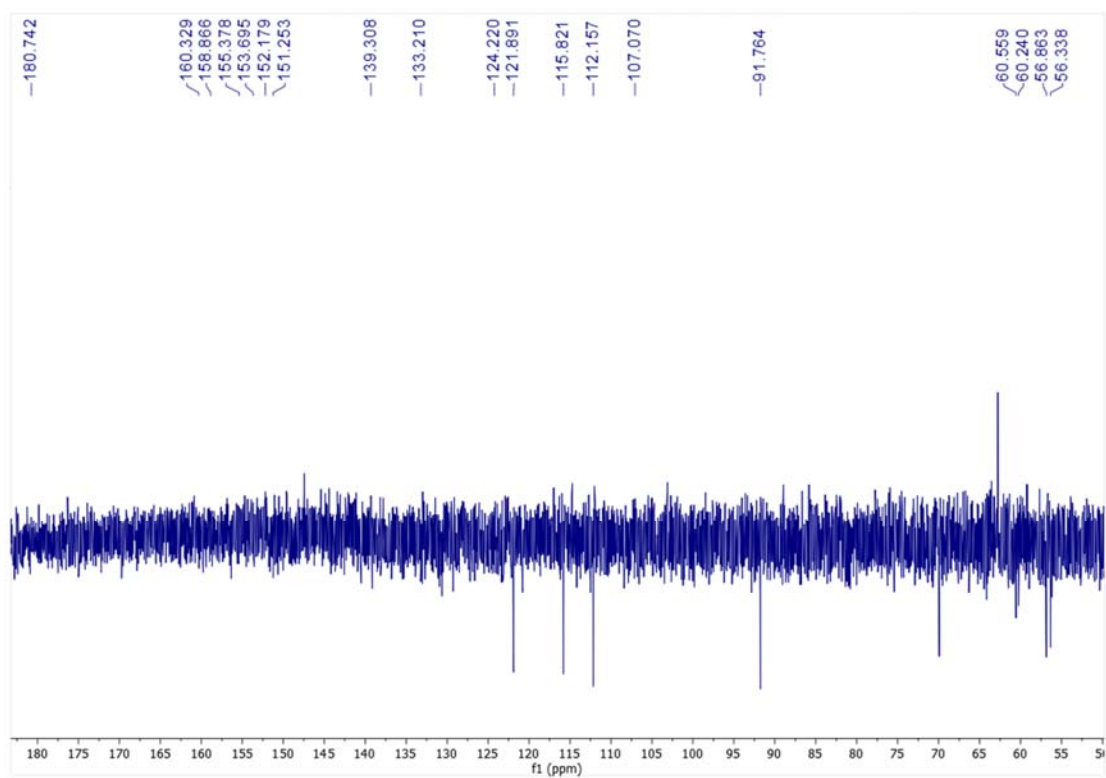

**Figure S9.2.** <sup>13</sup>C NMR spectrum of DL9 (Acetone-*d*<sub>6</sub>)

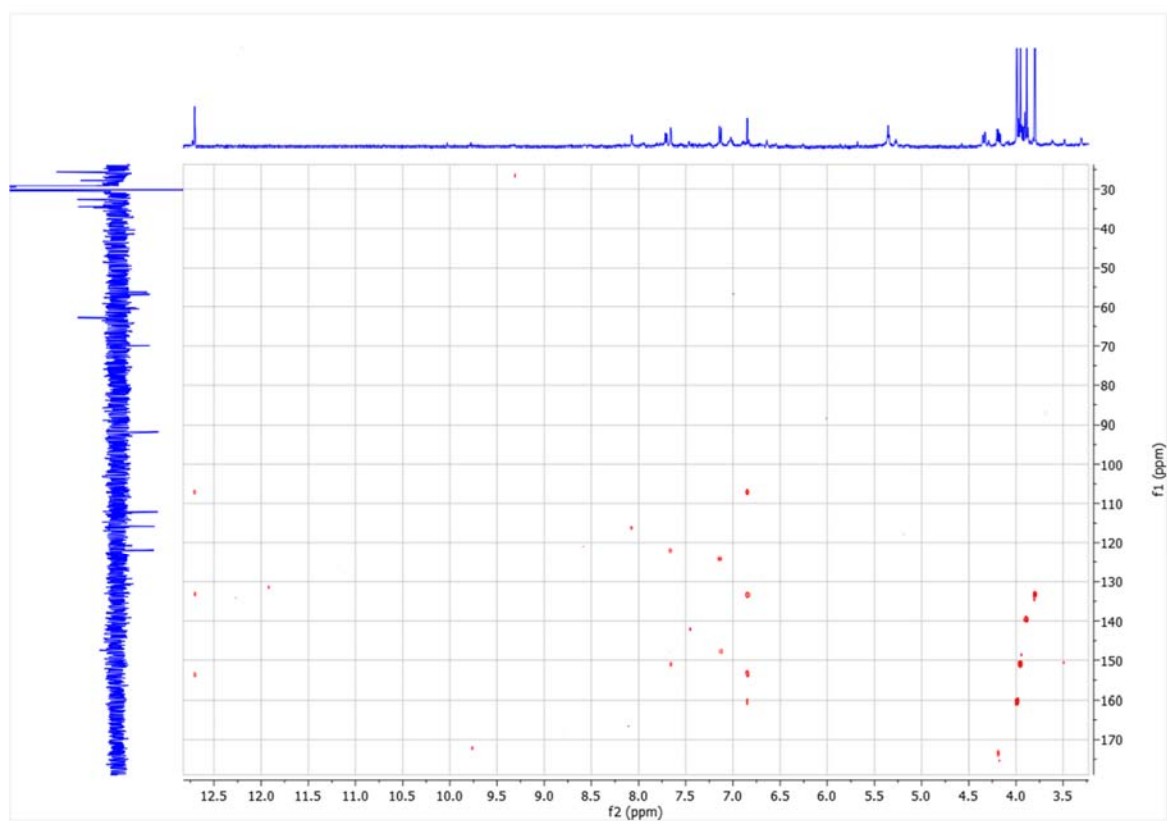

**Figure S9.3.** HMBC spectrum of **DL9** (Acetone- $d_6$ )

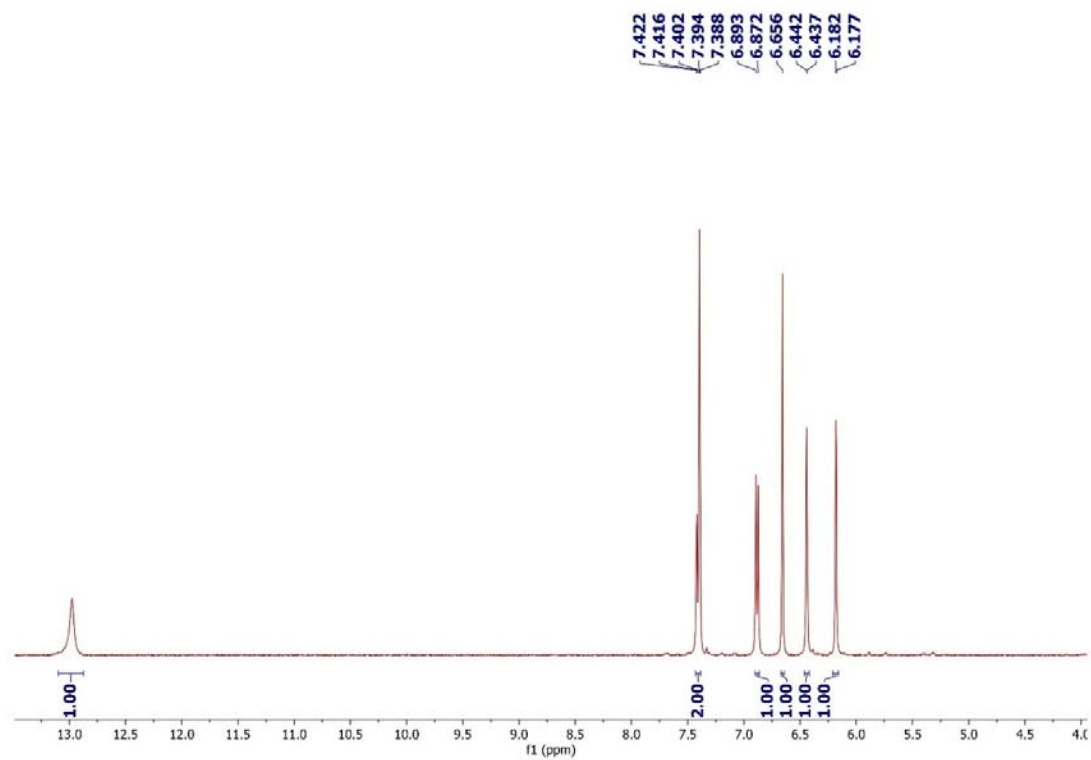

**Figure S10.1.**  $^1\text{H}$  NMR spectrum of **DL10** (DMSO- $d_6$ )

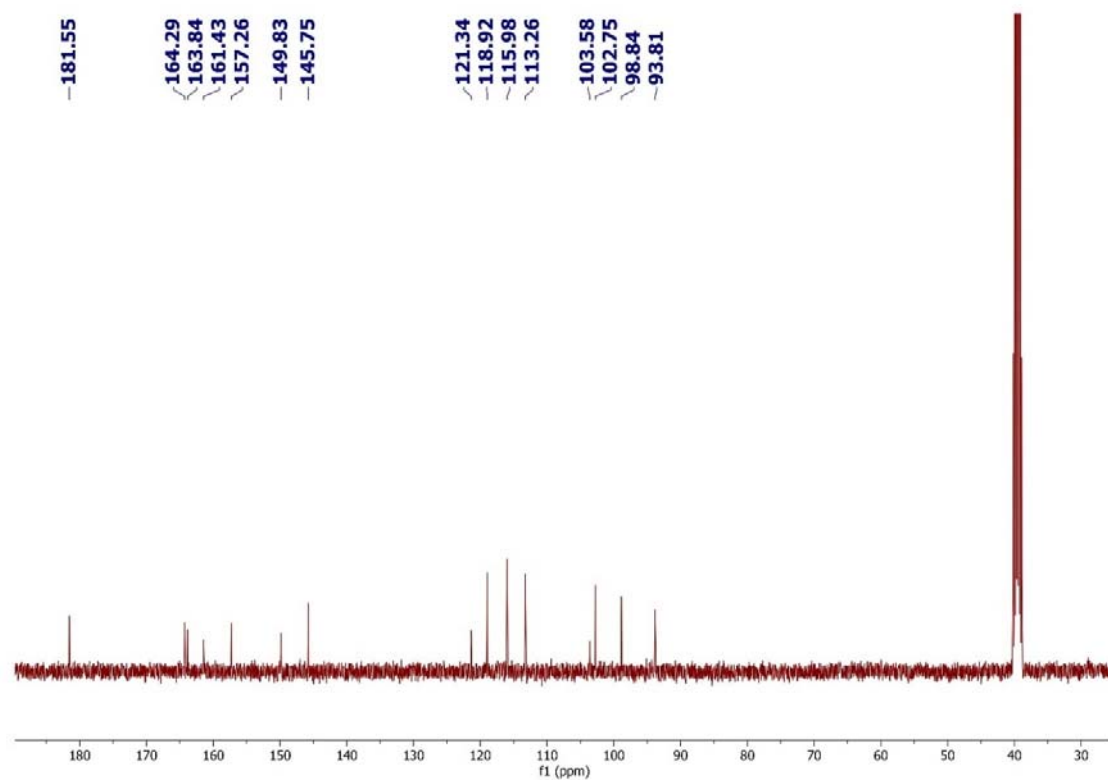

Figure S10.2. <sup>13</sup>C NMR spectrum of DL10 (DMSO-*d*<sub>6</sub>)

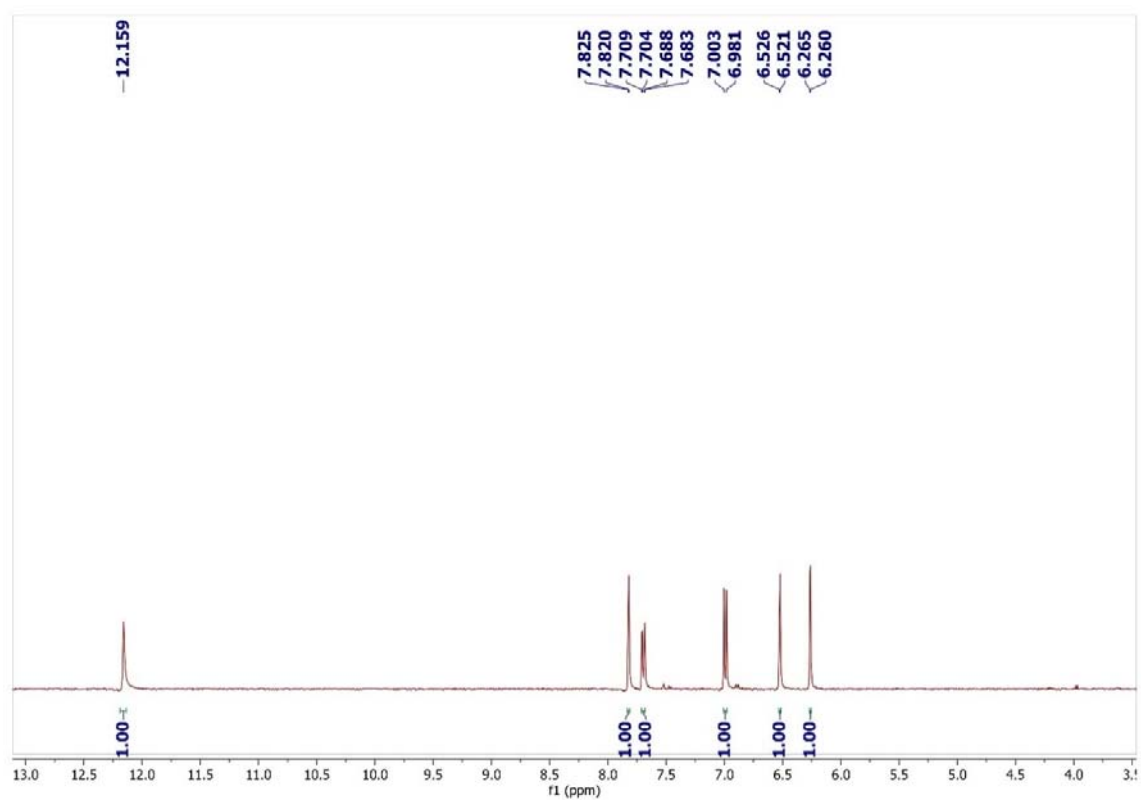

Figure S11.1. <sup>1</sup>H NMR spectrum of DL11 (Acetone-*d*<sub>6</sub>)

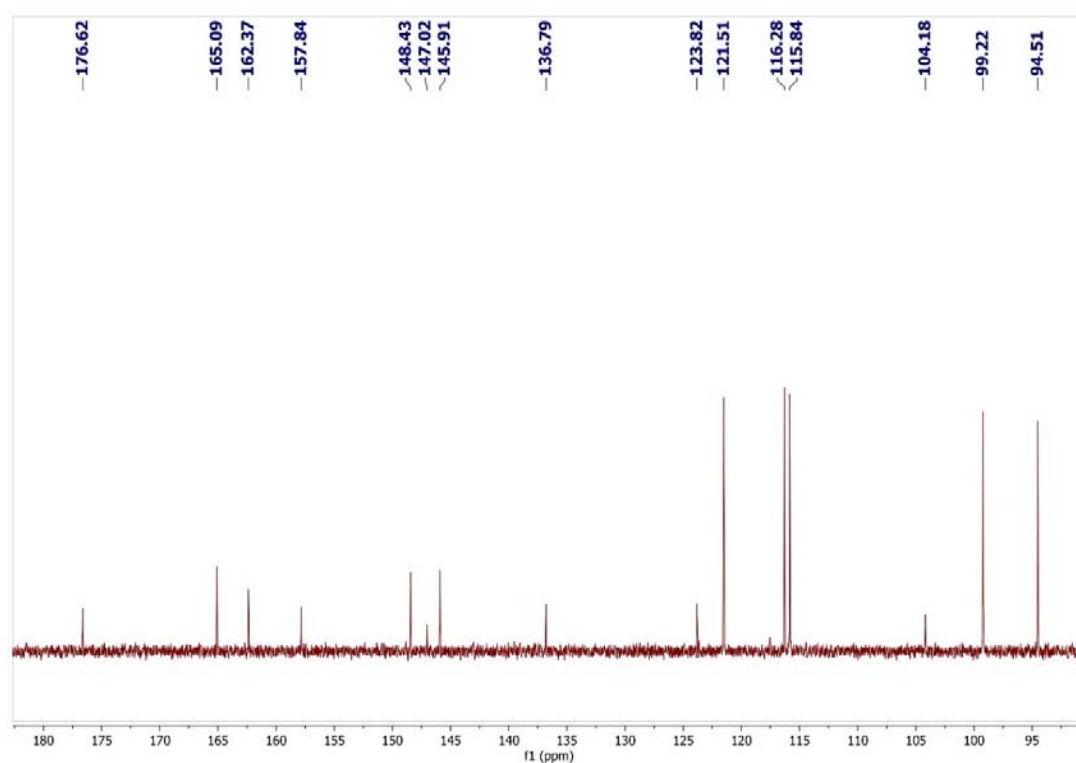

Figure S11.2. <sup>13</sup>C NMR spectrum of DL11 (Acetone-*d*<sub>6</sub>)

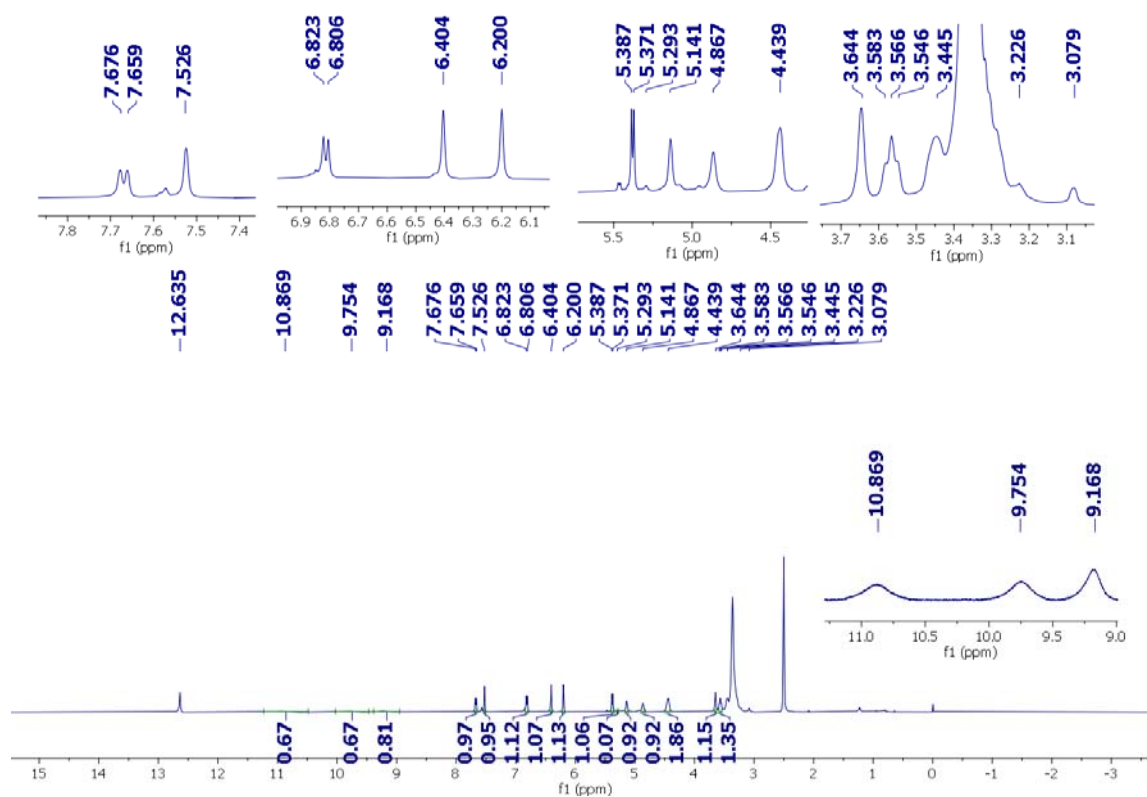

Figure S12.1. <sup>1</sup>H NMR spectrum of DL12 (DMSO-*d*<sub>6</sub>)

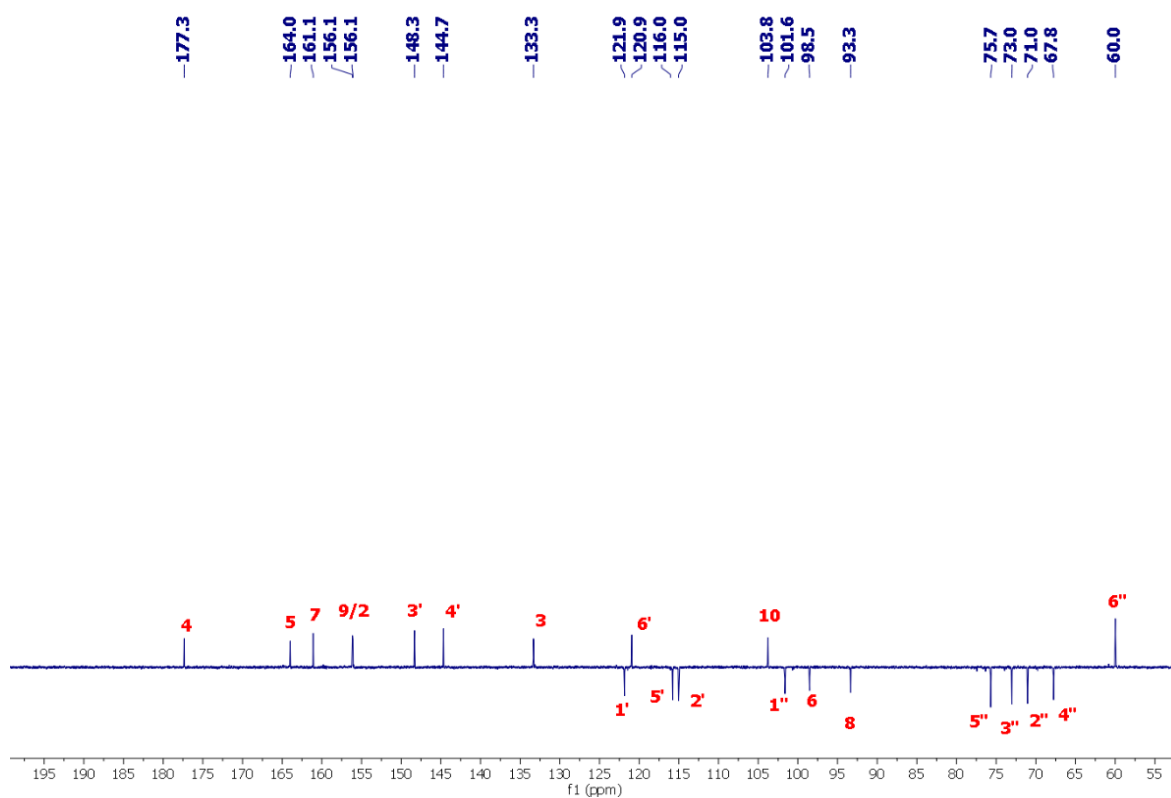

Figure S12.2.  $^{13}\text{C}$  NMR spectrum of DL12 (DMSO- $d_6$ )

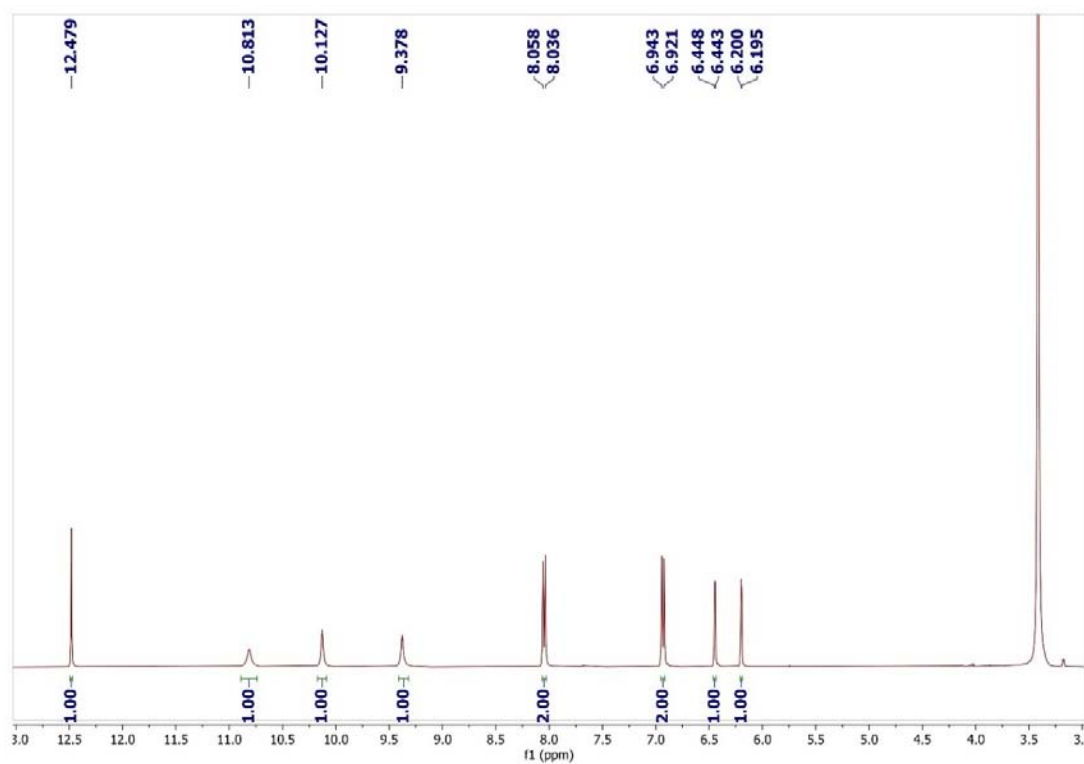

Figure S13.1.  $^1\text{H}$  NMR spectrum of DL13 (Acetone- $d_6$ )



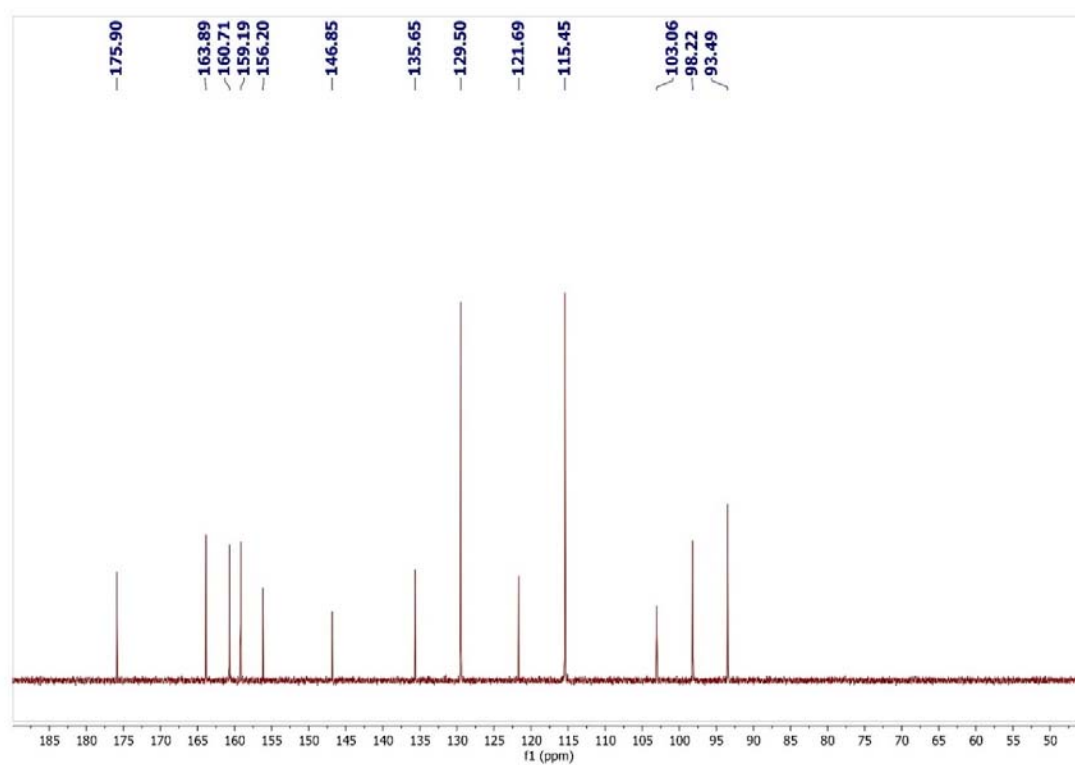

**Figure S13.2.** <sup>13</sup>C NMR spectrum of **DL13** (Acetone-*d*<sub>6</sub>)

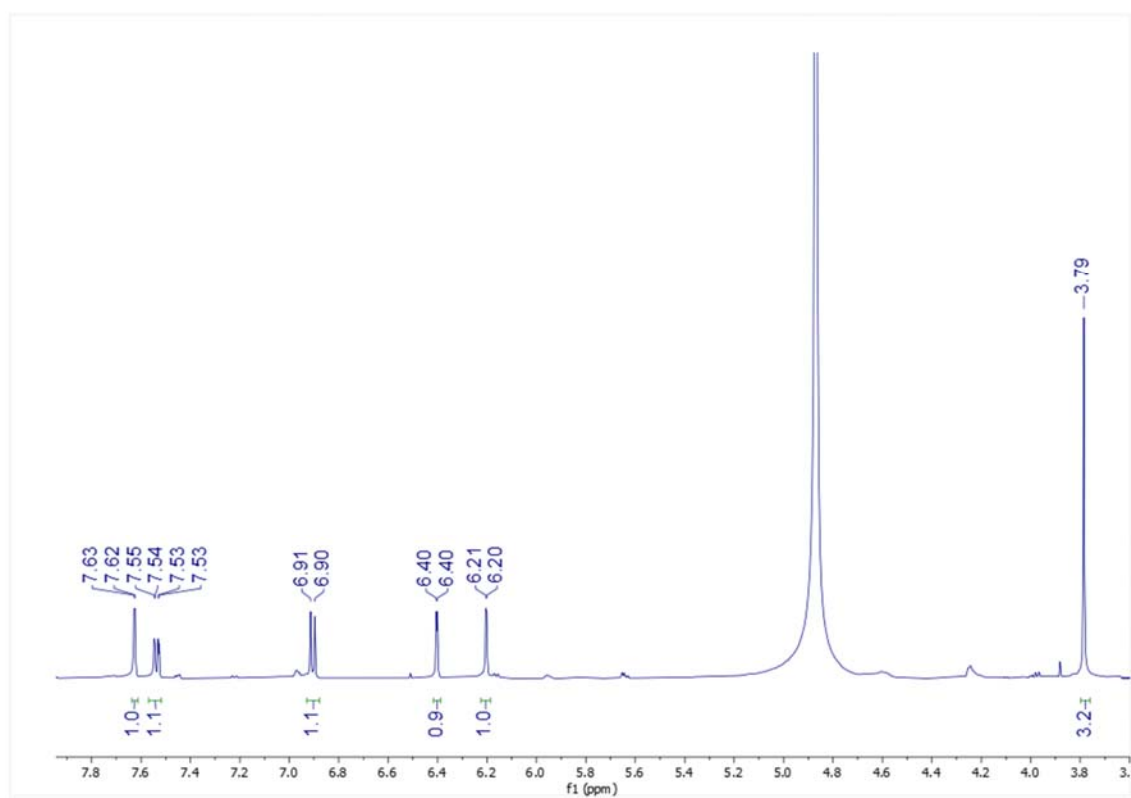

**Figure S14.1.**  $^1\text{H}$  NMR spectrum of PA1 ( $\text{Methanol-}d_4$ )

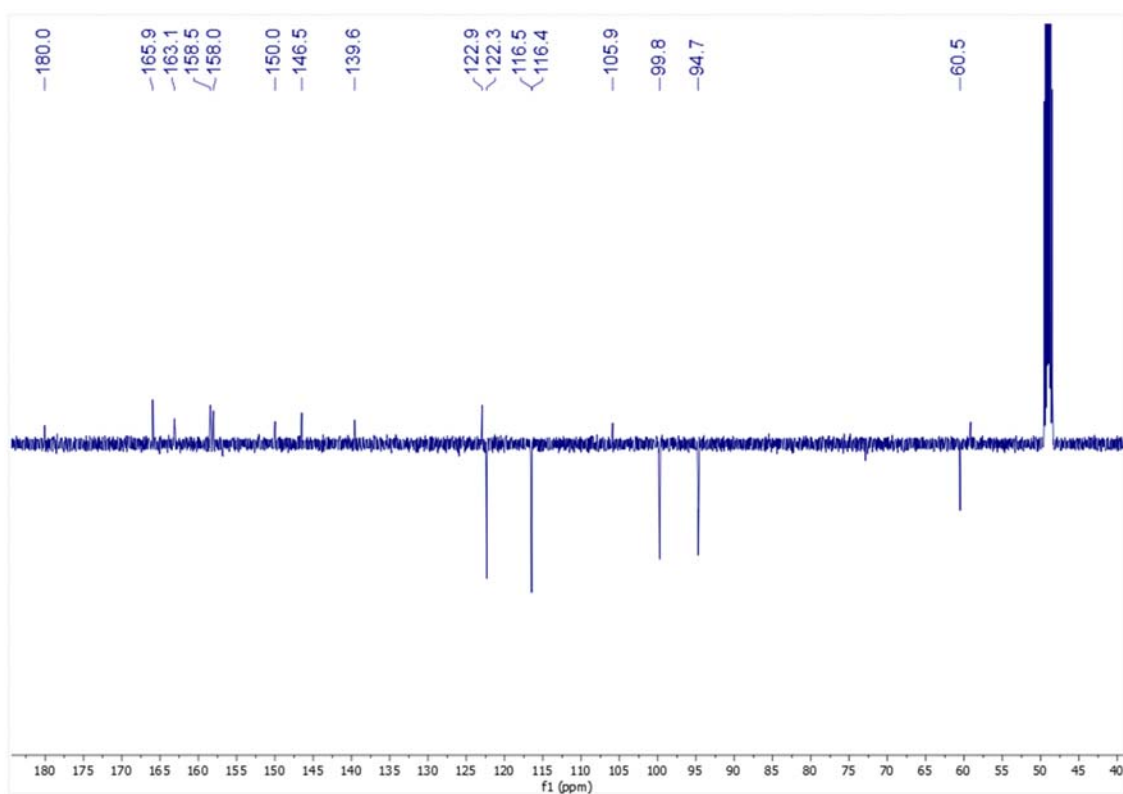

Figure S14.2. <sup>13</sup>C NMR spectrum of PA1 (Methanol-*d*<sub>4</sub>)

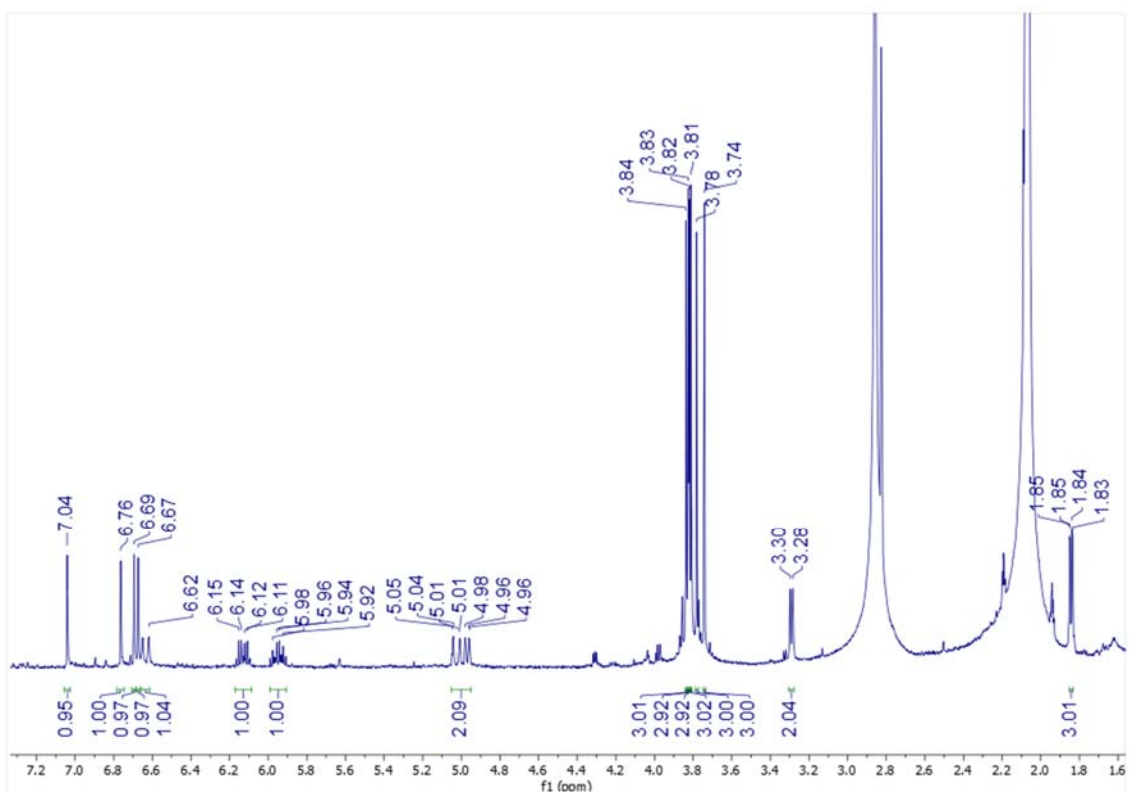

Figure S15.1. <sup>1</sup>H NMR spectrum of PA2 and PA3 (Acetone-*d*<sub>6</sub>)

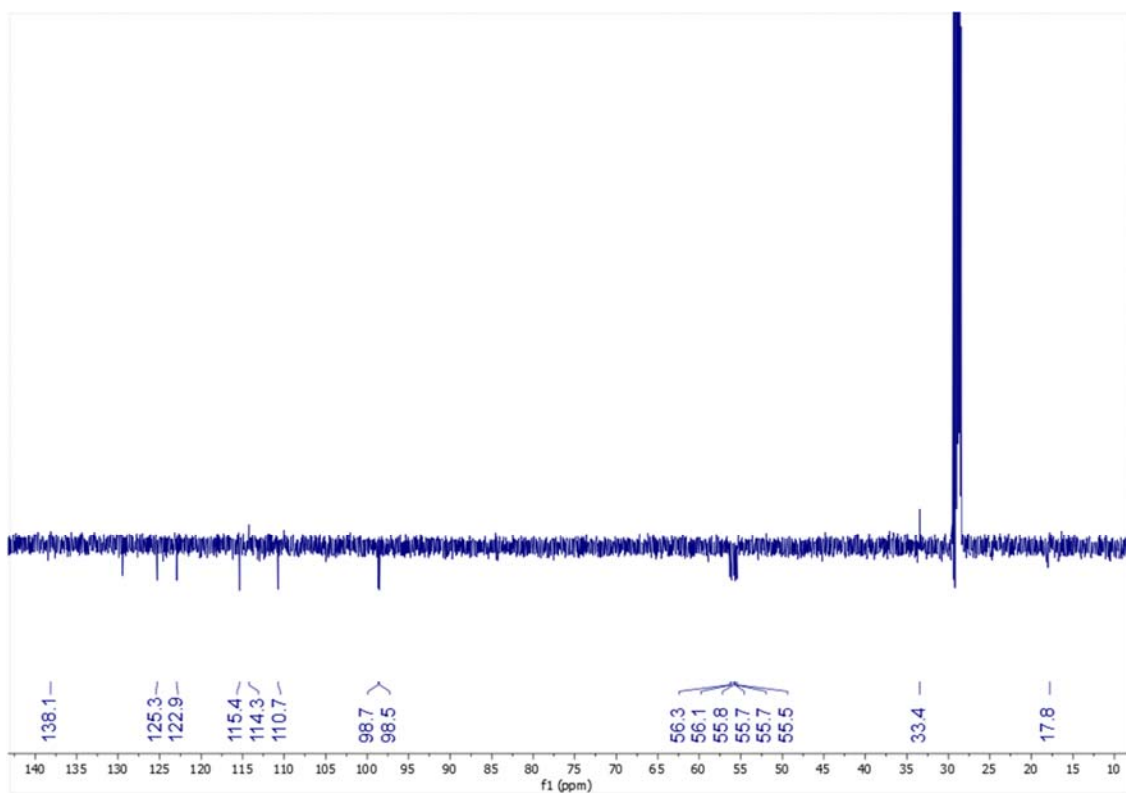

**Figure S15.2.**  $^{13}\text{C}$  NMR spectrum of PA2 and PA3 (Acetone- $d_6$ )

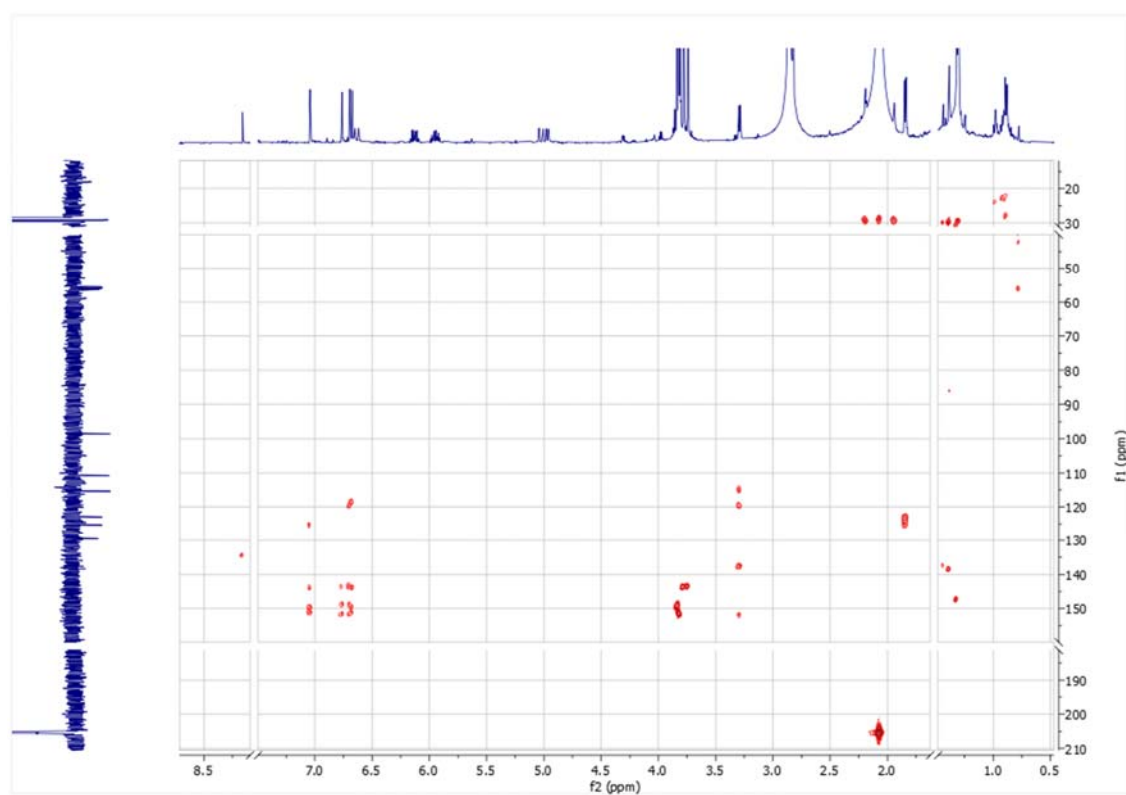

**Figure S15.3.** HMBC spectrum of PA2 and PA3 (Acetone- $d_6$ )

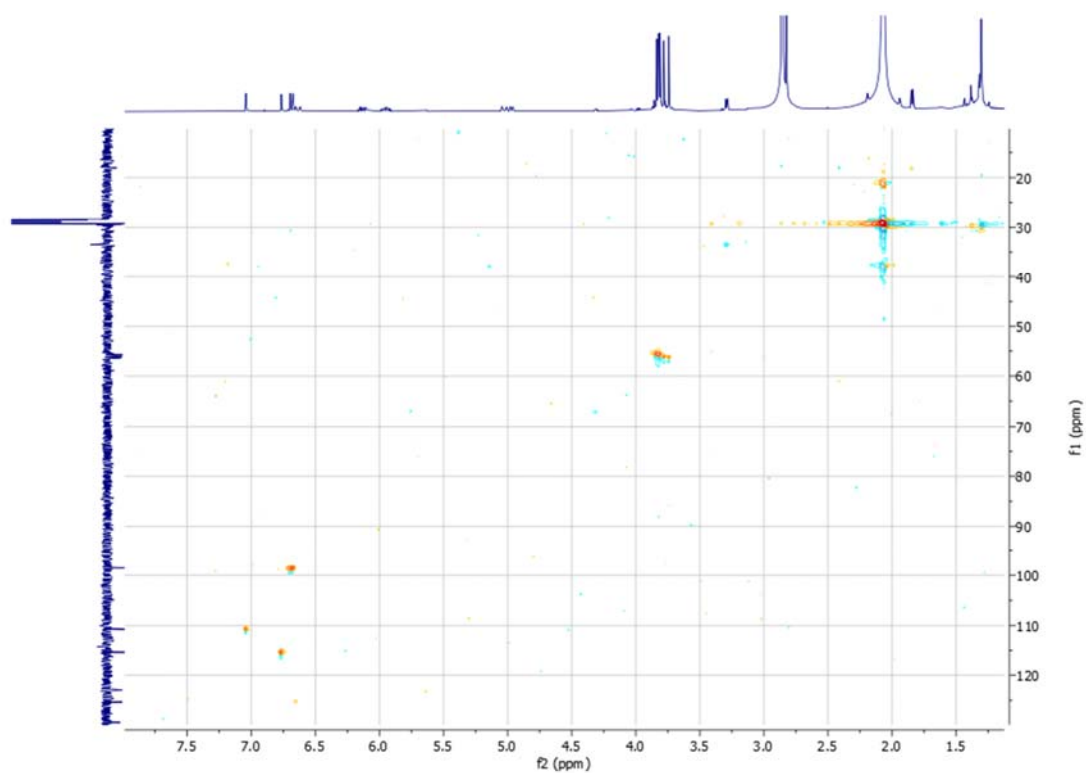

**Figure S15.4.** HSQC spectrum of PA2 and PA3 (Acetone-*d*<sub>6</sub>)

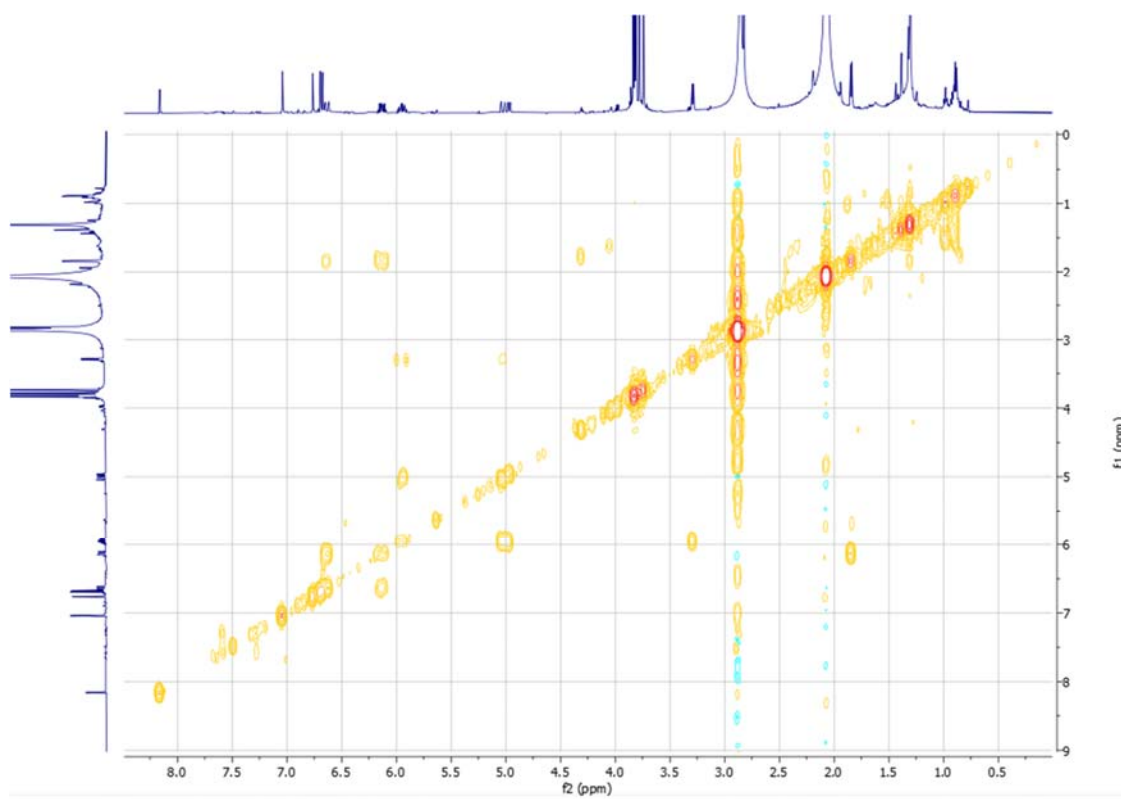

**Figure S15.5.** COSY spectrum of PA2 and PA3 (Acetone-*d*<sub>6</sub>)

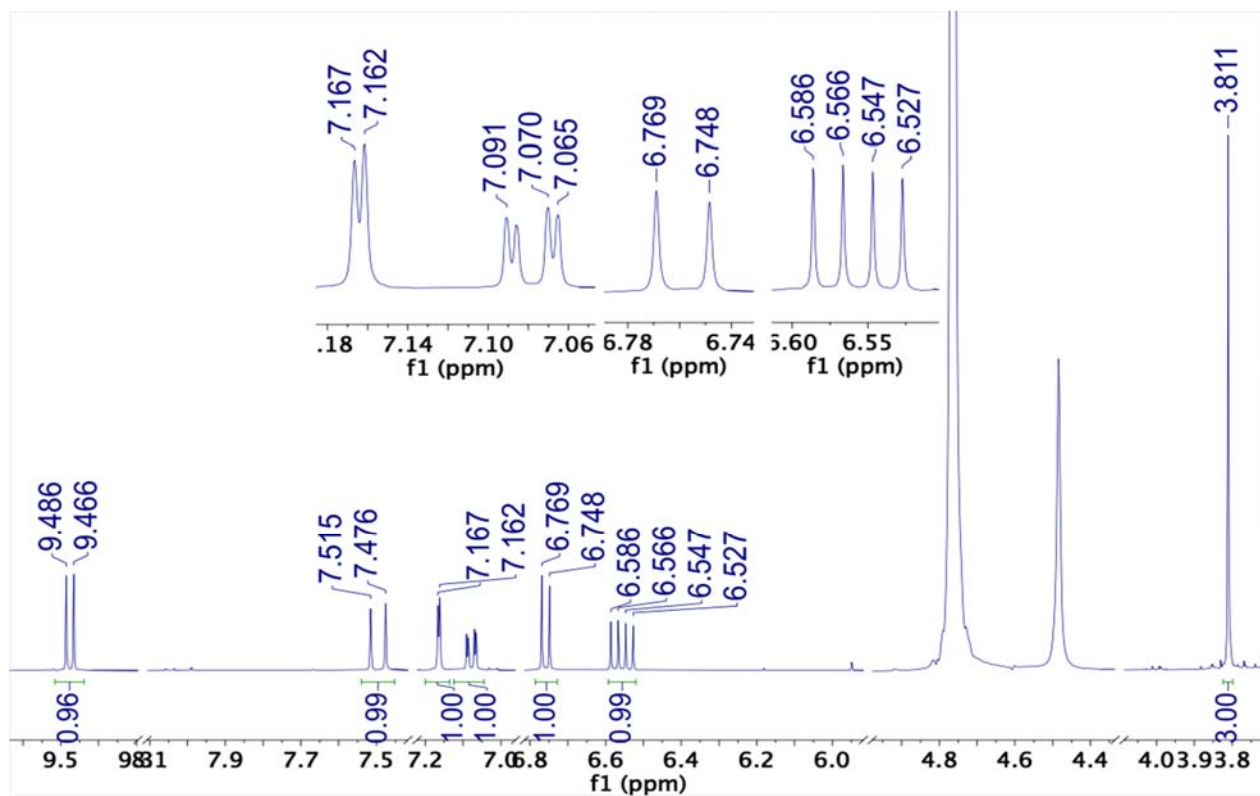

Figure S16.1. <sup>1</sup>H NMR spectrum of PA4 (Methanol-*d*<sub>4</sub>)

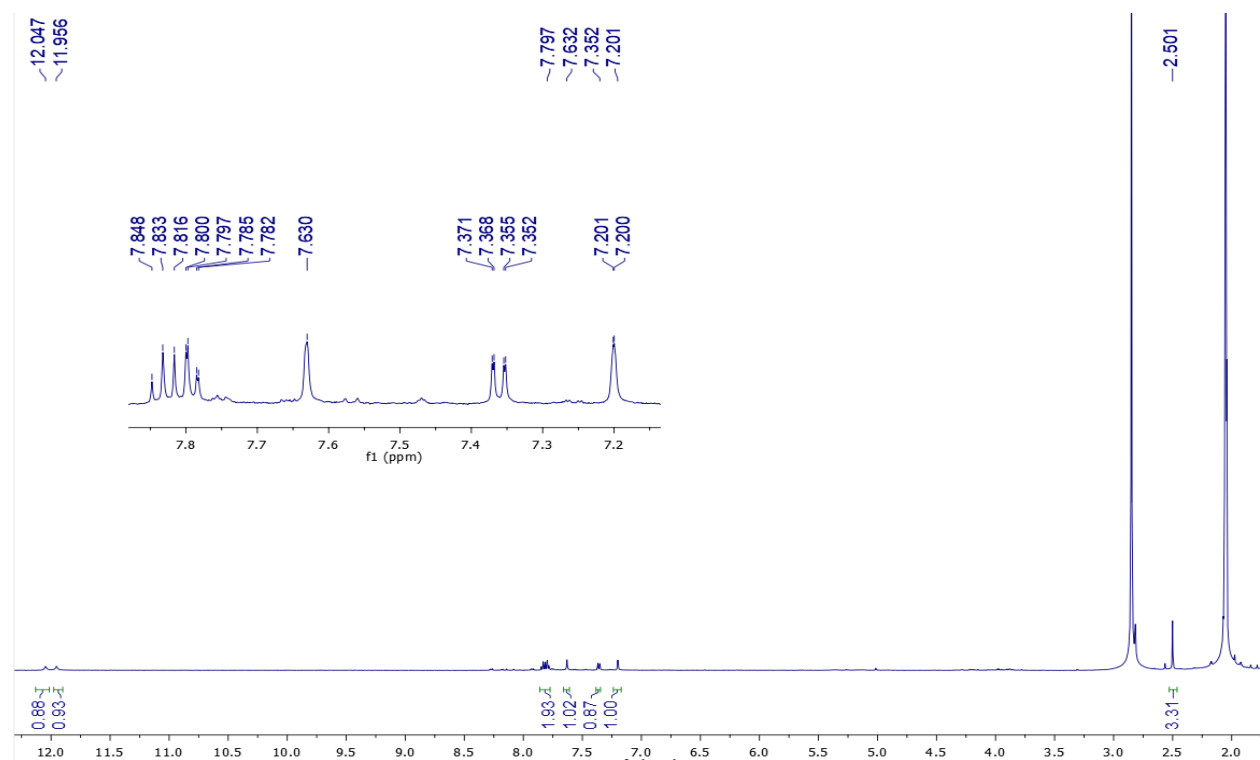

Figure S17.1. <sup>1</sup>H NMR spectrum of PA5 (Acetone-*d*<sub>6</sub>)

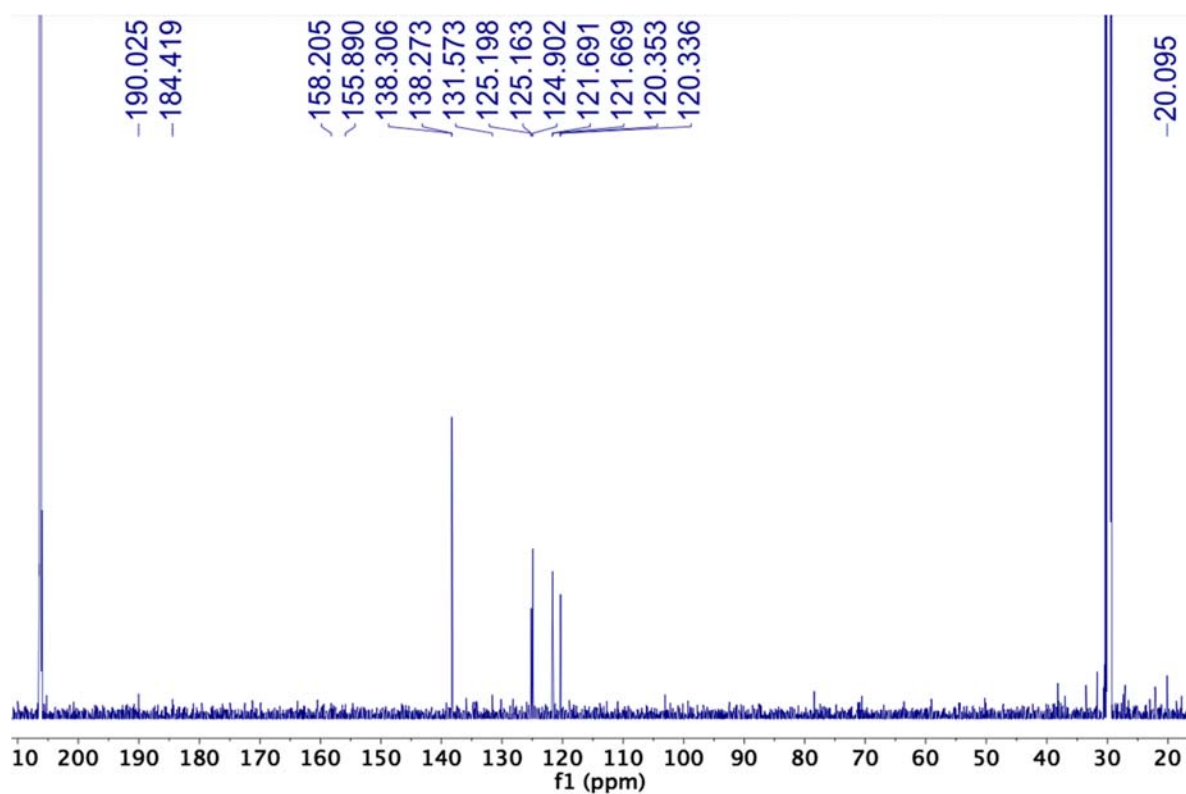

Figure S17.2. <sup>13</sup>C NMR spectrum of PA5 (Acetone-*d*<sub>6</sub>)

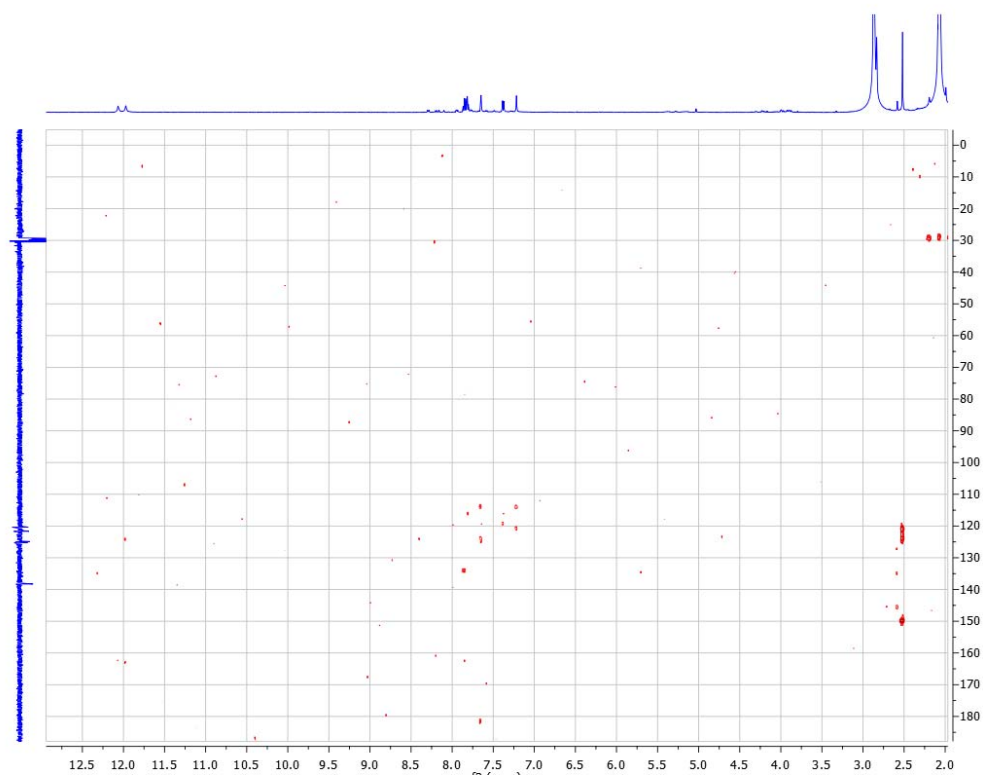

Figure S17.3. HMBC spectrum of PA5 (Acetone-*d*<sub>6</sub>)

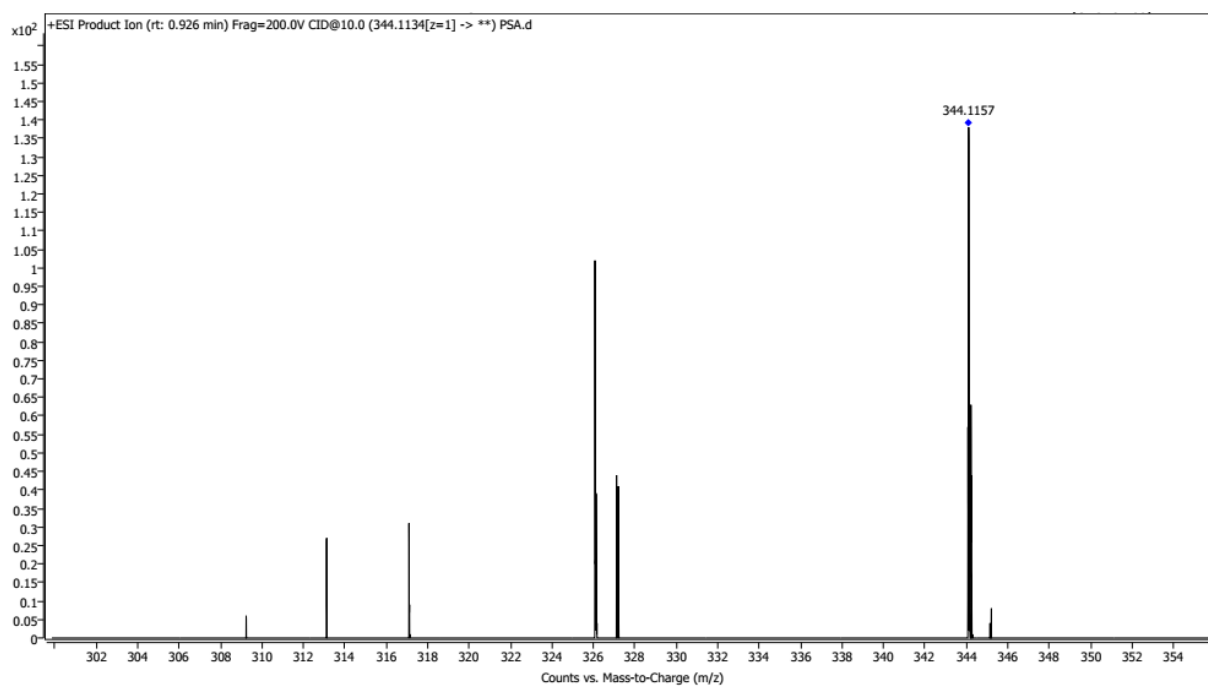

Figure S18.1. HRESIMS spectrum of PA6 (Acetone- $d_6$ )

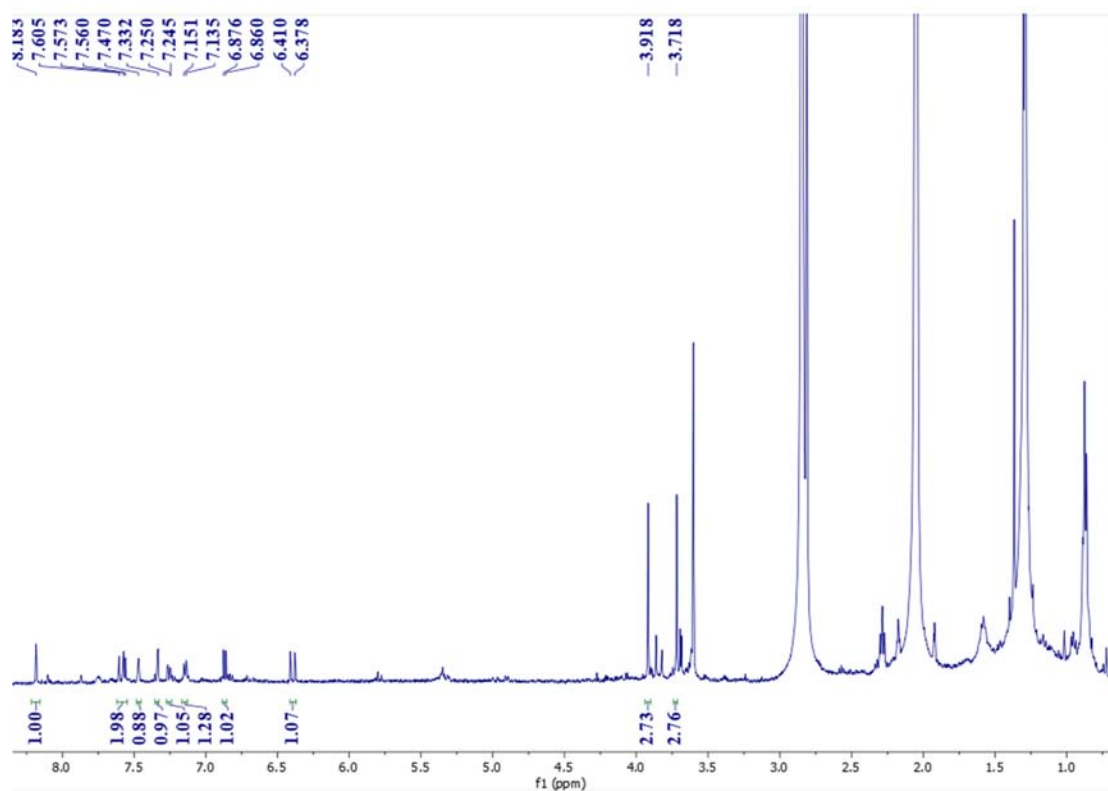

Figure S18.2.  $^1\text{H}$  NMR spectrum of PA6 (Acetone- $d_6$ )



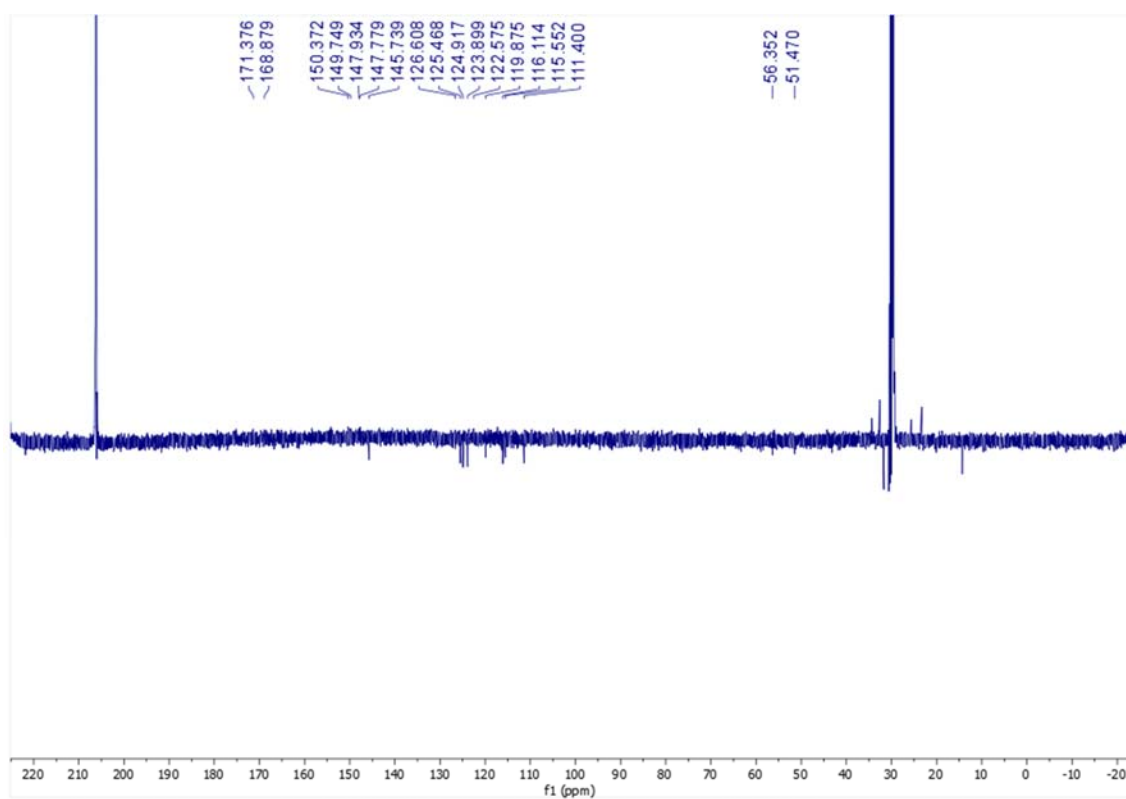

Figure S18.3. <sup>13</sup>C NMR spectrum of PA6 (Acetone-*d*<sub>6</sub>)

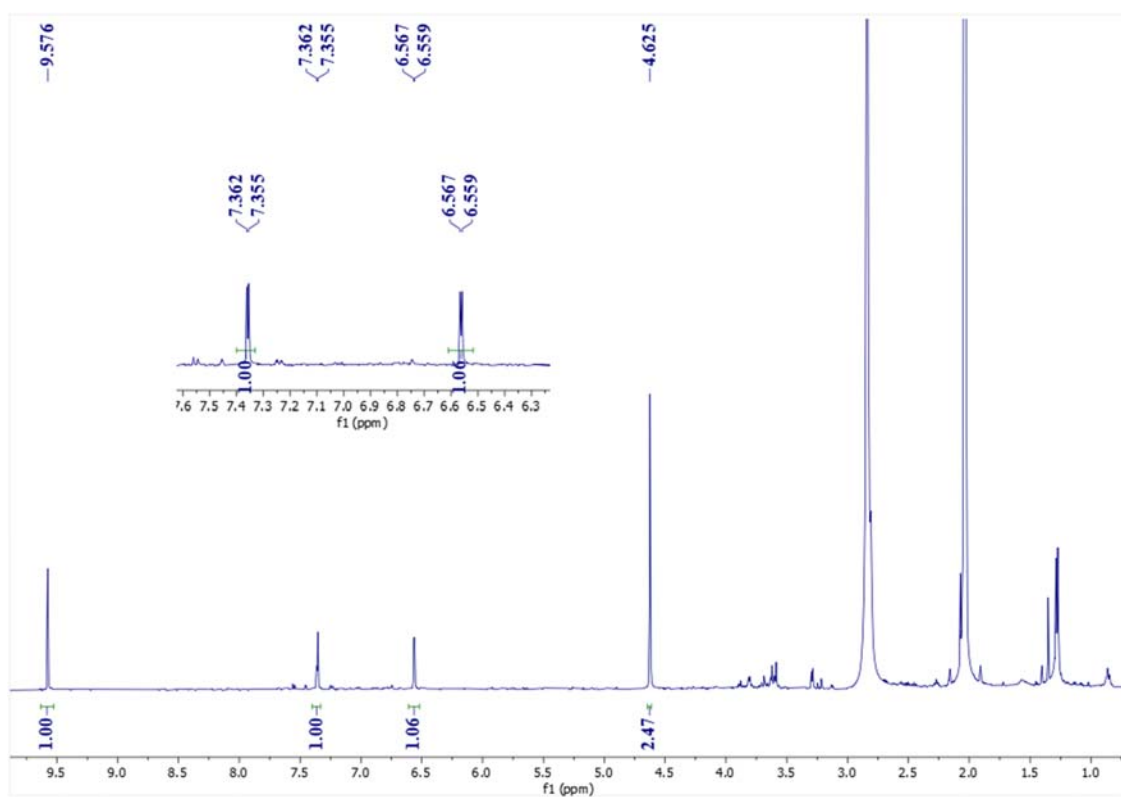

Figure S19.1. <sup>1</sup>H NMR spectrum of PA7 (Acetone-*d*<sub>6</sub>)

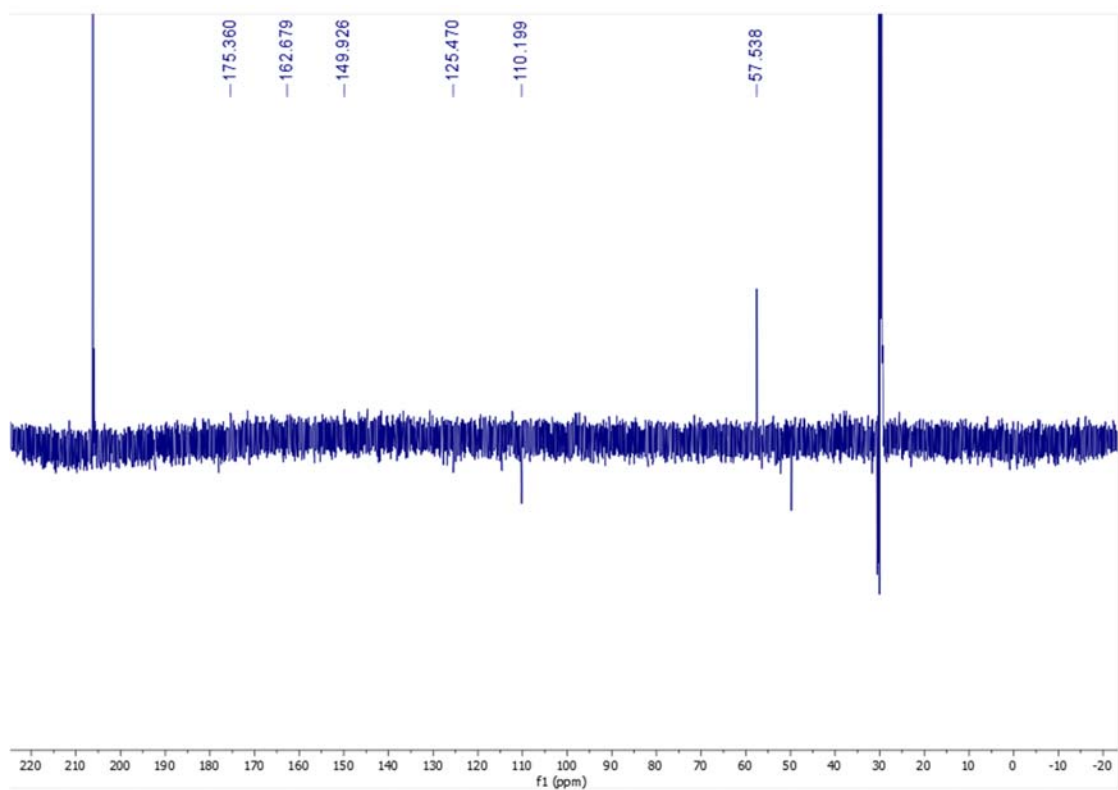

**Figure S19.2.**  $^{13}\text{C}$  NMR spectrum of **PA7** ( $\text{Acetone-}d_6$ )

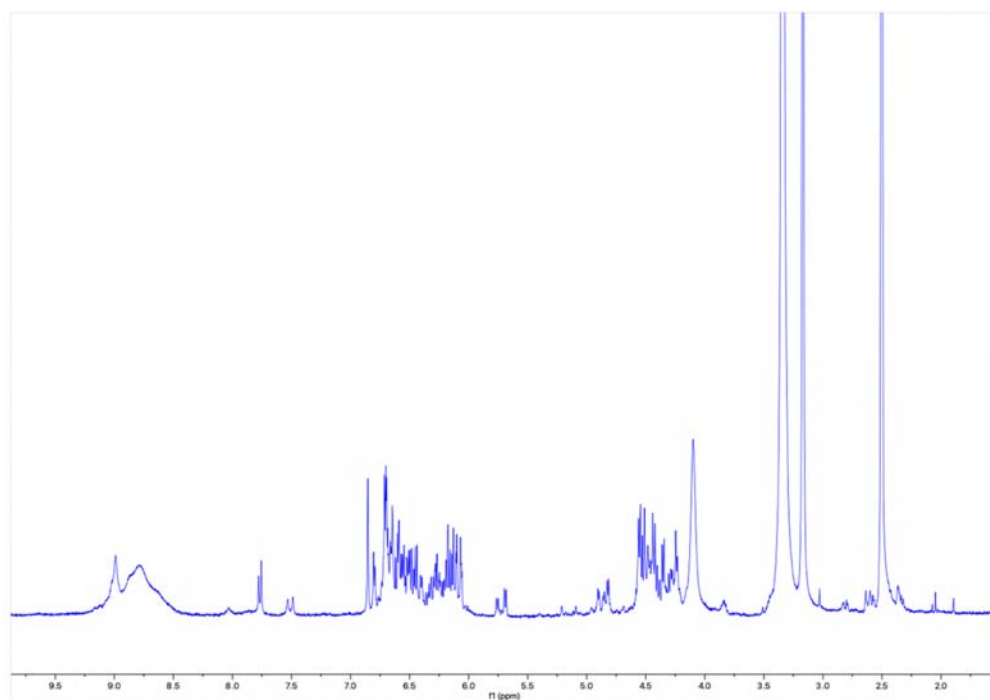

**Figure S20.1.**  $^1\text{H}$  NMR spectrum of the mixture of lignins ( $\text{Acetone-}d_6$ )

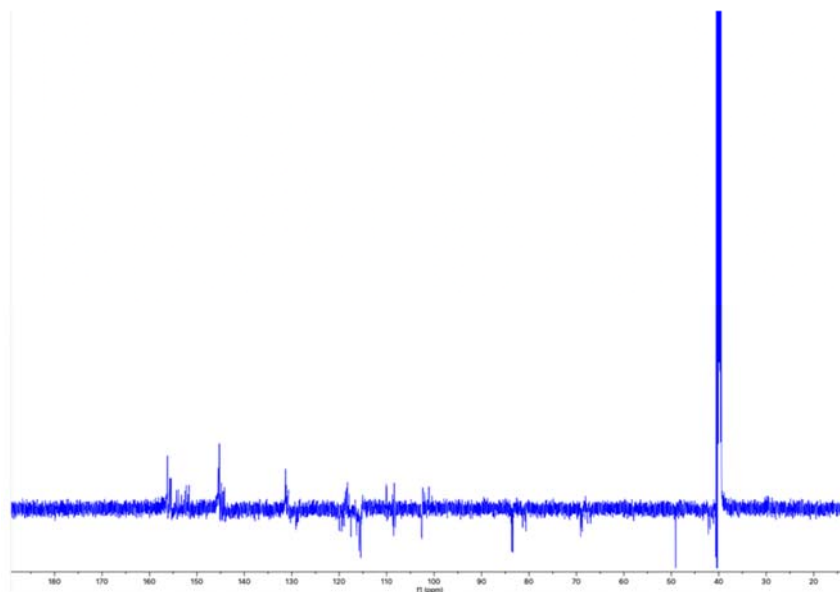

**Figure S20.2.**  $^{13}\text{C}$  NMR spectrum of the mixture of lignins (Acetone- $d_6$ )

## PSA15

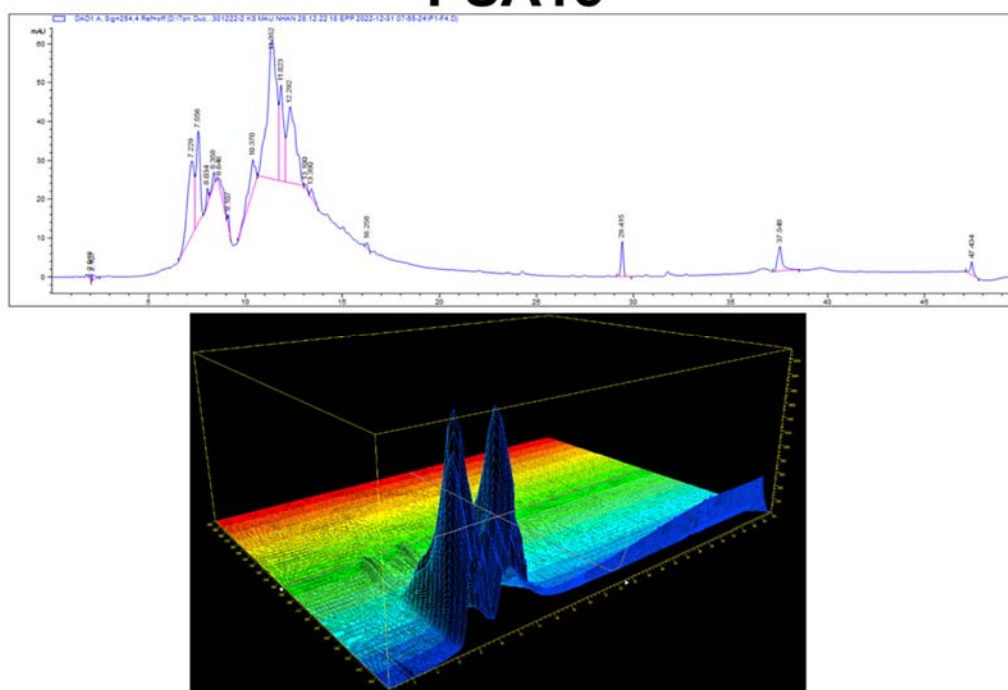

**Figure S20.3** HPLC chromatogram of the mixture of lignins

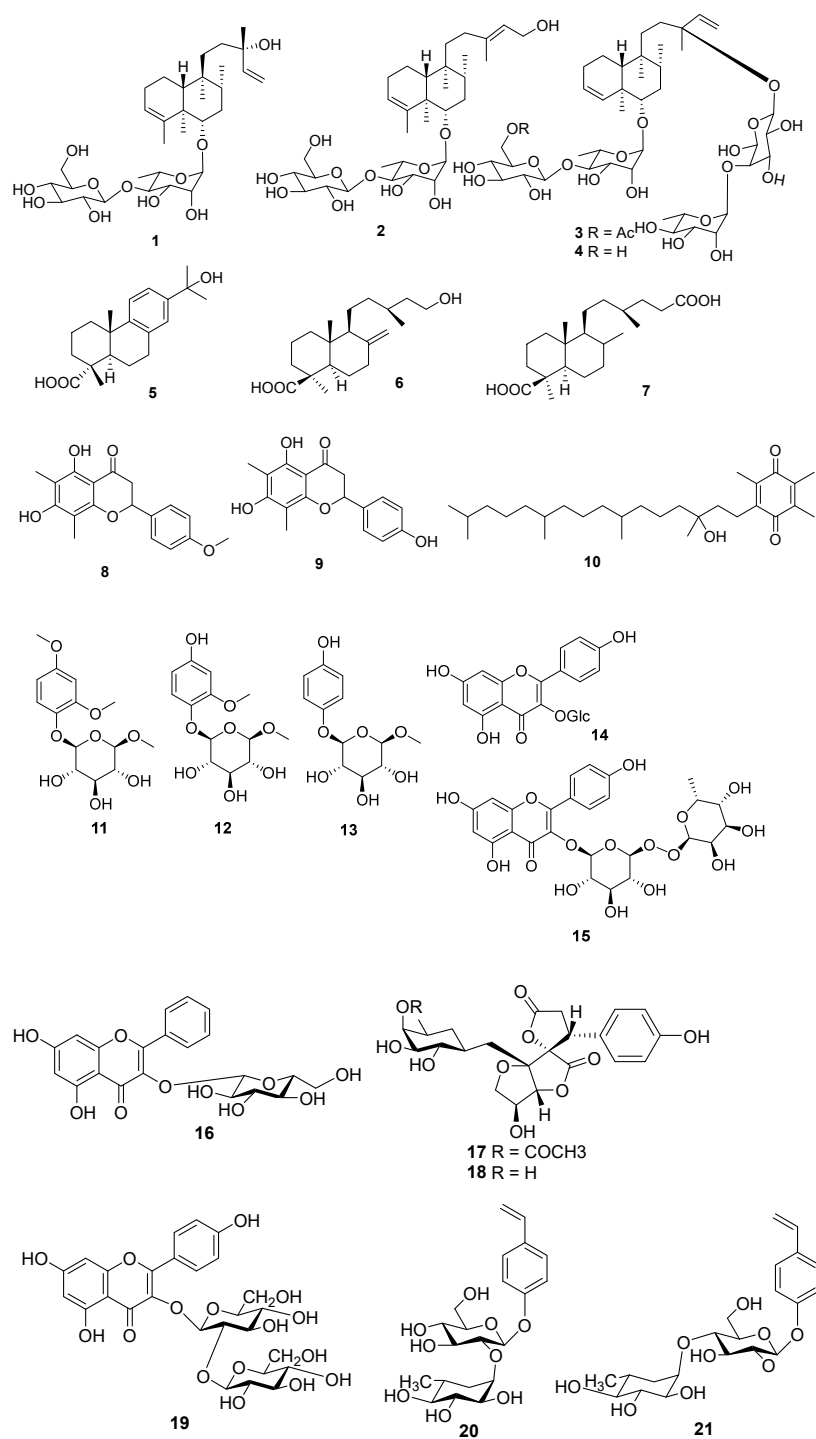

**Figure S21.** Chemical structures of compounds previously reported from *D. linearis*

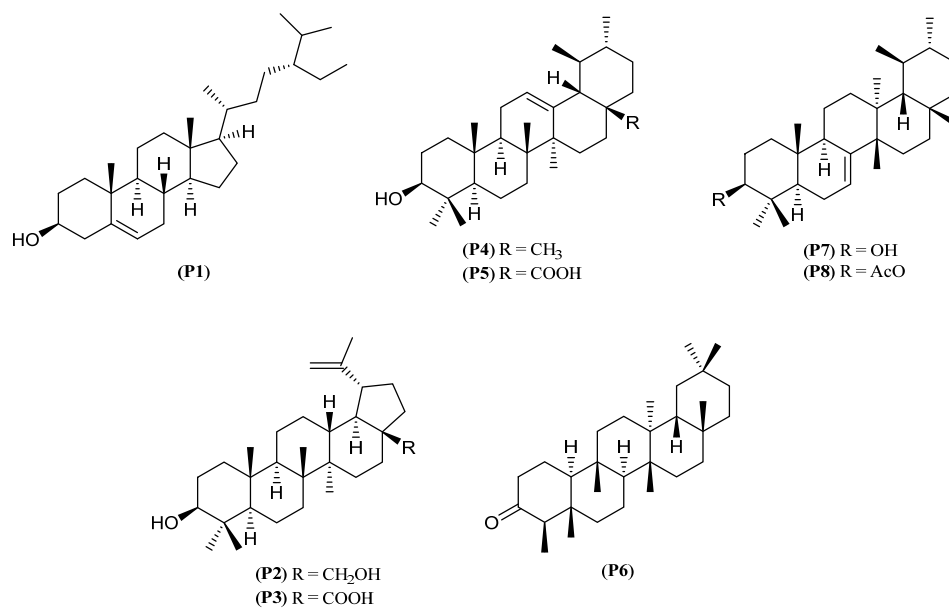

**Figure S22.** Chemical structures of compounds previously reported from *P. adenophylla*
